# Supplementary material for: CoCl2-promoted TEMPO oxidative homocoupling of indoles: access to tryptanthrin derivatives
Source: Royal Society of Chemistry journal article supplement (doi:10.1039/c8ob01216d), 2018-01-01
Supplement: c8ob01216d1.pdf [file c8ob01216d1.pdf]

## Supporting Information

### CoCl<sub>2</sub>-Promoted TEMPO Oxidative Homocoupling of Indoles: Access to Tryptanthrin Derivatives

Huiwu Liao,<sup>a</sup> Xiangjun Peng,<sup>b</sup> Dan Hu,<sup>a</sup> Xianyun Xu,<sup>b</sup> Panpan Huang,<sup>a</sup> Qian Liu,<sup>\*b</sup>  
Liangxian Liu<sup>\*a</sup>

<sup>a</sup> Department of Chemistry and Chemical Engineering, Gannan Normal University, Ganzhou,  
Jiangxi 341000, P. R. China

<sup>b</sup> School of Pharmaceutical Science, Gannan Medical University, Ganzhou, Jiangxi 341000, P. R.  
China

#### CONTENTS

|                                                                                          |    |
|------------------------------------------------------------------------------------------|----|
| 1. General Methods and Materials .....                                                   | 2  |
| 2. Selected optimization of the reaction conditions.....                                 | 2  |
| 3. General Procedure.....                                                                | 2  |
| 4. Spectroscopic Data of the Products <b>1</b> , <b>6</b> , <b>8</b> and <b>10</b> ..... | 2  |
| 5. Copies of <sup>1</sup> H, <sup>13</sup> C Spectra .....                               | 9  |
| 6. Copies of HRESIMS Spectra for <sup>18</sup> O- <b>6a</b> and <b>8c</b> .....          | 33 |
| 7. X-ray Data of Compound <b>6a</b> .....                                                | 35 |
| 8. X-ray Data of Compound <b>8a</b> .....                                                | 36 |
| 9. References.....                                                                       | 36 |

## 1. General Methods

$^1\text{H}$  and  $^{13}\text{C}$  NMR spectra were recorded on a Bruker spectrometers at 400 and 100 MHz, respectively. Mass spectra were recorded with Bruker Dalton Esquire 3000 plus LC-MS apparatus. Elemental analysis were carried out on a Perkin-Elmer 240B instrument. Silica gel (300-400 mesh) was used for flash column chromatography, eluting (unless otherwise stated) with an ethyl acetate/petroleum ether (PE) (60-90 °C) mixture.

## Materials

Commercially available starting materials and solvents were used as supplied, without further purification.

## 2. Selected optimization of the reaction conditions

Table S1: Influence of  $\text{CoCl}_2$  loadings<sup>a</sup>

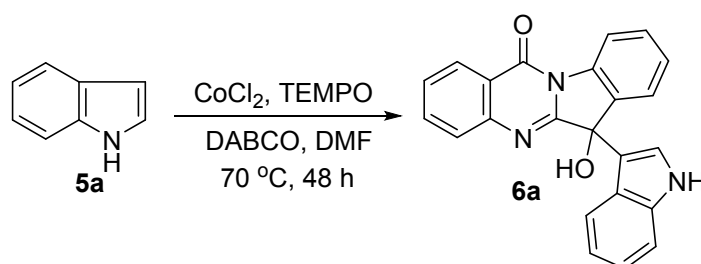

| Entry | $\text{CoCl}_2$ (mmol) | Yield (%) <sup>b</sup> |
|-------|------------------------|------------------------|
| 1     | 0.02                   | trace                  |
| 2     | 0.04                   | 35                     |
| 3     | 0.05                   | 59                     |
| 4     | 0.06                   | 72                     |
| 5     | 0.07                   | 72                     |
| 6     | 0.08                   | 64                     |

<sup>a</sup> Conditions: **5** (0.3 mmol), TEMPO (0.135 mmol), DABCO (0.15 mmol), and DMF (1 mL), 48 h, under open air. <sup>b</sup> Isolated yield.

## 3. General Procedure and Characterization Data of the Products 6.

To a solution of indole (0.3 mmol),  $\text{CoCl}_2$  (0.06 mmol), and TEMPO (0.135 mmol) in DMF (1 mL) was added DABCO (0.15 mmol) under an air atmosphere and the mixture was stirred at 70 °C for 48 h. The reaction mixture was concentrated under reduced pressure. The residue was purified by flash chromatography on silica gel (eluent: EtOAc/PE = 1:1) to yield the corresponding product **6**.

spectrometer.

## 4. Spectroscopic Data of the Products 1, 6, and 8.

Indolo[2,1-*b*]quinazoline-6,12-dione (tryptanthrin) (**1**)

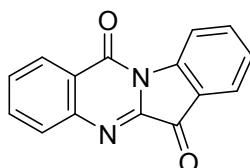

$^1\text{H}$  NMR (400 MHz,  $\text{DMSO}-d_6$ ):  $\delta$  8.49 (d,  $J = 7.9$  Hz, 1H, Ar-H), 8.33 (d,  $J = 7.9$  Hz, 1H, Ar-H), 7.95 (d,  $J = 3.7$  Hz, 2H, Ar-H), 7.89 (d,  $J = 7.9$  Hz, 1H, Ar-H), 7.87 (d,  $J = 7.9$  Hz, 1H, Ar-H),

7.78-7.73 (m, 1H, Ar-H), 7.49 (d,  $J = 7.5$  Hz, 1H, Ar-H).  $^{13}\text{C}$  NMR (100 MHz,  $\text{DMSO-}d_6$ ):  $\delta$  182.9, 158.2, 146.9, 146.5, 145.5, 138.2, 135.6, 130.4, 130.3, 127.4, 127.3, 125.2, 123.8, 122.7, 117.5. MS (ESI): 249 ( $\text{M}+\text{H}^+$ , 100). These assignments matched with those previously published.<sup>1</sup>  
6-Hydroxy-6-(1*H*-indol-3-yl)indolo[2,1-*b*]quinazolin-12(6*H*)-one (**6a**)

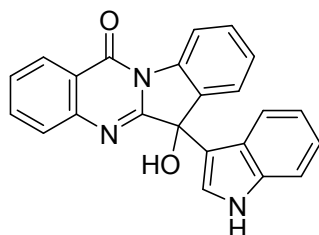

Yellow amorphous solid, 27.6 mg, 78% yield.  $^1\text{H}$  NMR (400 MHz,  $\text{DMSO-}d_6$ ):  $\delta$  11.13 (d,  $J = 1.6$  Hz, 1H, NH), 8.55 (d,  $J = 8.0$  Hz, 1H, Ar-H), 8.32 (dd,  $J = 8.0, 1.6$  Hz, 1H, Ar-H), 7.83 (dt,  $J = 1.5, 8.4$  Hz, 1H, Ar-H), 7.67 (d,  $J = 7.7$  Hz, 1H, Ar-H), 7.58 (t,  $J = 8.0$  Hz, 1H, Ar-H), 7.55 (t,  $J = 8.8$  Hz, 1H, Ar-H), 7.50 (d,  $J = 7.7$  Hz, 1H, Ar-H), 7.37-7.33 (m, 3H, Ar-H), 7.07 (d,  $J = 8.0$  Hz, 1H, Ar-H), 6.99 (t,  $J = 7.8$  Hz, 1H, Ar-H), 6.88 (s, 1H, OH), 6.80 (t,  $J = 7.2$  Hz, 1H, Ar-H).  $^{13}\text{C}$  NMR (100 MHz,  $\text{DMSO-}d_6$ ):  $\delta$  162.0, 159.5, 147.6, 138.6, 137.3, 136.2, 135.2, 130.2, 128.2, 127.9, 127.4, 126.9, 125.5, 125.0, 124.3, 121.8, 121.6, 119.8, 119.3, 116.7, 116.0, 112.2, 77.3. MS (ESI): 366 ( $\text{M}+\text{H}^+$ , 100), 388 ( $\text{M}+\text{Na}^+$ , 30). Anal calcd for  $\text{C}_{23}\text{H}_{15}\text{N}_3\text{O}_2$ : C, 75.60; H, 4.14; N, 11.50. Found C, 75.32; H, 4.41; N, 11.25.

2,8-Difluoro-6-(5-fluoro-1*H*-indol-3-yl)-6-hydroxyindolo[2,1-*b*]quinazolin-12(6*H*)-one (**6b**)

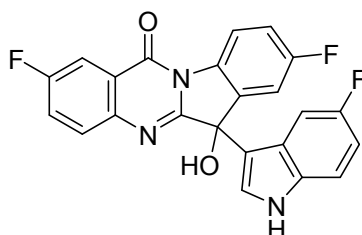

Yellow amorphous solid, 29.2 mg, 70% yield.  $^1\text{H}$  NMR (400 MHz,  $\text{DMSO-}d_6$ ):  $\delta$  11.26 (s, 1H, NH), 8.52 (dd,  $J = 8.7, 4.5$  Hz, 1H, Ar-H), 7.96 (d,  $J = 8.4$  Hz, 1H, Ar-H), 7.77-7.69 (m, 2H, Ar-H), 7.45-7.31 (m, 3H, Ar-H), 7.25 (d,  $J = 1.9$  Hz, 1H, Ar-H), 7.18 (d,  $J = 8.9$  Hz, 1H, Ar-H), 7.02 (s, 1H, OH), 6.90 (t,  $J = 8.9$  Hz, 1H, Ar-H).  $^{13}\text{C}$  NMR (100 MHz,  $\text{DMSO-}d_6$ ):  $\delta$  161.2 (d,  $J = 244.6$  Hz), 161.1 (d,  $J = 246.5$  Hz), 161.0, 158.6 (d,  $J = 3.3$  Hz), 157.1 (d,  $J = 231.4$  Hz), 144.3, 138.3 (d,  $J = 8.0$  Hz), 134.7 (d,  $J = 1.9$  Hz), 134.0, 131.0 (d,  $J = 8.5$  Hz), 126.6, 125.4 (d,  $J = 10.5$  Hz), 123.5 (d,  $J = 24.0$  Hz), 123.2 (d,  $J = 8.6$  Hz), 118.5 (d,  $J = 8.4$  Hz), 117.1 (d,  $J = 23.6$  Hz), 115.5 (d,  $J = 4.6$  Hz), 113.2 (d,  $J = 9.8$  Hz), 112.8 (d,  $J = 24.7$  Hz), 111.8 (d,  $J = 13.9$  Hz), 110.1 (d,  $J = 26.1$  Hz), 105.4 (d,  $J = 24.0$  Hz), 77.0 (d,  $J = 1.4$  Hz). MS (ESI): 420 ( $\text{M}+\text{H}^+$ , 100). Anal calcd for  $\text{C}_{23}\text{H}_{12}\text{F}_3\text{N}_3\text{O}_2$ : C, 65.87; H, 2.88; N, 10.02. Found C, 65.57; H, 3.14; N, 9.90.

2,8-Dibromo-6-(5-bromo-1*H*-indol-3-yl)-6-hydroxyindolo[2,1-*b*]quinazolin-12(6*H*)-one (**6c**)

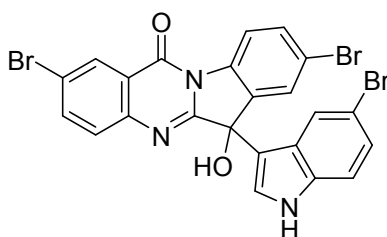

Yellow amorphous solid, 43.5 mg, 72% yield.  $^1\text{H}$  NMR (400 MHz,  $\text{DMSO-}d_6$ ):  $\delta$  11.37 (d,  $J = 2.2$

Hz, 1H, NH), 8.43 (d,  $J = 8.6$  Hz, 1H, Ar-H), 8.34 (d,  $J = 2.0$  Hz, 1H, Ar-H), 7.99 (dd,  $J = 8.6, 2.0$  Hz, 1H, Ar-H), 7.85 (s, 1H, Ar-H), 7.79 (dd,  $J = 8.6, 2.0$  Hz, 1H, Ar-H), 7.69 (d,  $J = 2.0$  Hz, 1H, Ar-H), 7.62 (d,  $J = 8.6$  Hz, 1H, Ar-H), 7.34 (d,  $J = 8.6$  Hz, 1H, Ar-H), 7.19 (dd,  $J = 8.6, 2.0$  Hz, 1H, Ar-H), 7.16 (d,  $J = 2.2$  Hz, 1H, Ar-H), 7.08 (s, 1H, OH).  $^{13}\text{C}$  NMR (100 MHz, DMSO- $d_6$ ):  $\delta$  161.5, 158.2, 146.5, 138.2, 138.1, 137.6, 136.1, 133.4, 130.5, 129.0, 128.2, 127.1, 126.2, 124.4, 123.4, 123.3, 120.6, 119.8, 118.8, 114.9, 114.3, 112.0, 77.1. MS (ESI): 600 ( $\text{M}+\text{H}^+$ , 30), 602 ( $\text{M}+\text{H}^+$ , 100), 604 ( $\text{M}+\text{H}^+$ , 100). Anal calcd for  $\text{C}_{23}\text{H}_{12}\text{Br}_3\text{N}_3\text{O}_2$ : C, 45.88; H, 2.01; N, 6.98. Found C, 46.19; H, 2.25; N, 6.61.

6-Hydroxy-2,8-diiodo-6-(5-iodo-1*H*-indol-3-yl)indolo[2,1-*b*]quinazolin-12(6*H*)-one (**6d**)

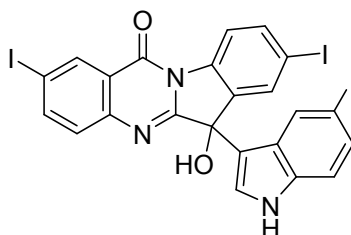

Yellow amorphous solid, 55.6 mg, 75% yield.  $^1\text{H}$  NMR (400 MHz, DMSO- $d_6$ ):  $\delta$  11.29 (s, 1H, NH), 8.51 (s, 1H, Ar-H), 8.27 (s, 1H, Ar-H), 8.12 (s, 1H, Ar-H), 8.03 (s, 1H, Ar-H), 7.93 (s, 1H, Ar-H), 7.82 (s, 1H, Ar-H), 7.43 (s, 1H, Ar-H), 7.32 (s, 1H, Ar-H), 7.22 (s, 1H, Ar-H), 7.07 (s, 1H, OH), 6.99 (s, 1H, Ar-H).  $^{13}\text{C}$  NMR (100 MHz, DMSO- $d_6$ ):  $\delta$  161.4, 158.1, 146.9, 143.8, 139.2, 138.1, 138.0, 136.4, 135.1, 133.8, 130.2, 129.8, 129.6, 128.0, 125.7, 123.5, 118.9, 114.8, 114.7, 93.3, 92.1, 83.3, 77.0. MS (ESI): 744 ( $\text{M}+\text{H}^+$ , 100). Anal calcd for  $\text{C}_{23}\text{H}_{12}\text{I}_3\text{N}_3\text{O}_2$ : C, 37.18; H, 1.63; N, 5.65. Found C, 37.43; H, 2.96; N, 5.52.

6-Hydroxy-2,8-dimethyl-6-(5-methyl-1*H*-indol-3-yl)indolo[2,1-*b*]quinazolin-12(6*H*)-one (**6e**)

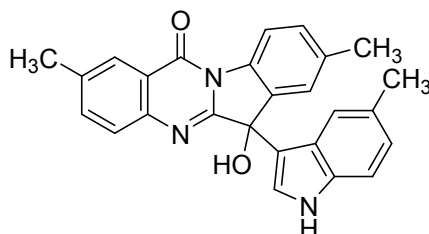

Yellow amorphous solid, 33.6 mg, 83% yield.  $^1\text{H}$  NMR (400 MHz, DMSO- $d_6$ ):  $\delta$  10.95 (s, 1H, NH), 8.41 (s, 1H, Ar-H), 8.10 (s, 1H, Ar-H), 7.64 (s, 1H, Ar-H), 7.56 (s, 1H, Ar-H), 7.34 (s, 1H, Ar-H), 7.26-7.21 (m, 3H, Ar-H), 6.85 (s, 1H, Ar-H), 6.82 (s, 1H, Ar-H), 6.75 (s, 1H, OH), 2.48 (s, 3H,  $\text{CH}_3$ ), 2.31 (s, 3H,  $\text{CH}_3$ ), 2.16 (s, 3H,  $\text{CH}_3$ ).  $^{13}\text{C}$  NMR (100 MHz, DMSO- $d_6$ ):  $\delta$  161.3, 159.3, 145.7, 137.6, 136.7, 136.4, 136.3, 136.2, 135.6, 130.5, 128.0, 127.5, 126.3, 125.8, 125.3, 124.2, 123.1, 121.5, 119.5, 116.4, 115.7, 111.8, 77.3, 21.8, 21.4, 21.3. MS (ESI): 408 ( $\text{M}+\text{H}^+$ , 100). Anal calcd for  $\text{C}_{26}\text{H}_{21}\text{N}_3\text{O}_2$ : C, 76.64; H, 5.19; N, 10.31. Found C, 76.57; H, 5.39; N, 9.96.

6-Hydroxy-2,8-dimethoxy-6-(5-methoxy-1*H*-indol-3-yl)indolo[2,1-*b*]quinazolin-12(6*H*)-one (**6f**)

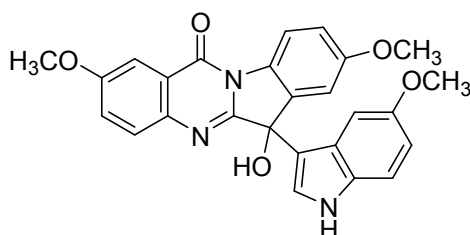

Yellow amorphous solid, 39.5 mg, 87% yield.  $^1\text{H}$  NMR (400 MHz, DMSO- $d_6$ ):  $\delta$  10.92 (d,  $J = 2.3$

Hz, 1H, NH), 8.45 (d,  $J = 7.8$  Hz, 1H, Ar-H), 7.66 (d,  $J = 3.0$  Hz, 1H, Ar-H), 7.60 (d,  $J = 8.9$  Hz, 1H, Ar-H), 7.41 (dd,  $J = 8.9, 3.0$  Hz, 1H, Ar-H), 7.22 (d,  $J = 8.0$  Hz, 1H, Ar-H), 7.19 (d,  $J = 2.6$  Hz, 1H, Ar-H), 7.11 (dd,  $J = 8.9, 2.6$  Hz, 1H, Ar-H), 7.05 (d,  $J = 2.6$  Hz, 1H, Ar-H), 6.82 (s, 1H, OH), 6.67-6.63 (m, 2H, Ar-H), 3.89 (s, 3H, OCH<sub>3</sub>), 3.75 (s, 3H, OCH<sub>3</sub>), 3.55 (s, 3H, OCH<sub>3</sub>). <sup>13</sup>C NMR (100 MHz, DMSO-*d*<sub>6</sub>):  $\delta$  159.8, 158.8, 158.7, 158.6, 153.3, 141.9, 137.9, 132.5, 132.0, 129.7, 125.5, 124.9, 124.1, 122.6, 117.7, 115.8, 115.1, 112.7, 111.4, 111.2, 107.2, 102.3, 77.2, 56.2, 56.1, 55.5. MS (ESI): 456 (M+H<sup>+</sup>, 100). Anal calcd for C<sub>26</sub>H<sub>21</sub>N<sub>3</sub>O<sub>5</sub>: C, 68.56; H, 4.65; N, 9.23. Found C, 68.72; H, 4.70; N, 8.91.

6-(5-Cyano-1*H*-indol-3-yl)-6-hydroxy-12-oxo-6,12-dihydroindolo[2,1-*b*]quinazoline-2,8-dicarbonitrile (**6g**)

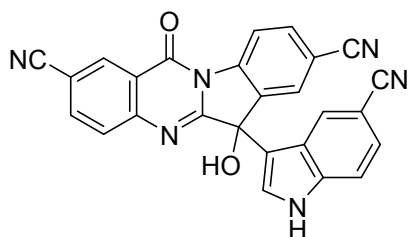

Yellow amorphous solid, 23.4 mg, 53% yield. <sup>1</sup>H NMR (400 MHz, DMSO-*d*<sub>6</sub>):  $\delta$  11.27 (s, 1H, NH), 8.53 (d,  $J = 4.4$  Hz, 1H, Ar-H), 7.98 (s, 1H, Ar-H), 7.80-7.52 (m, 2H, Ar-H), 7.48-7.33 (m, 3H, Ar-H), 7.26 (s, 1H, Ar-H), 7.18 (d,  $J = 9.6$  Hz, 1H, Ar-H), 7.03 (s, 1H, OH), 6.95-6.87 (m, 1H, Ar-H). <sup>13</sup>C NMR (100 MHz, DMSO-*d*<sub>6</sub>):  $\delta$  162.4, 162.3, 161.1, 160.0, 159.8, 158.6, 158.2, 155.9, 144.3, 138.4, 134.7, 134.0, 131.0, 126.6, 125.4, 123.7, 123.2, 118.5, 117.2, 115.5, 113.3, 112.7, 111.7, 110.2, 105.5, 77.0. MS (ESI): 441 (M+H<sup>+</sup>, 100). Anal calcd for C<sub>26</sub>H<sub>12</sub>N<sub>6</sub>O<sub>2</sub>: C, 70.91; H, 2.75; N, 19.08. Found C, 70.56; H, 2.94; N, 18.77.

3,9-Difluoro-6-(6-fluoro-1*H*-indol-3-yl)-6-hydroxyindolo[2,1-*b*]quinazolin-12(6*H*)-one (**6h**)

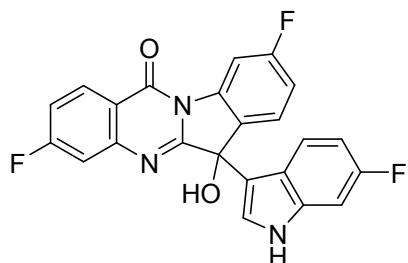

Yellow amorphous solid, 26.7 mg, 64% yield. <sup>1</sup>H NMR (400 MHz, DMSO-*d*<sub>6</sub>):  $\delta$  11.21 (s, 1H, NH), 8.35 (dd,  $J = 8.8, 5.9$  Hz, 1H, Ar-H), 8.25 (dd,  $J = 9.5, 2.3$  Hz, 1H, Ar-H), 7.57-7.43 (m, 3H, Ar-H), 7.34 (dd,  $J = 8.8, 5.9$  Hz, 1H, Ar-H), 7.23 (dt,  $J = 9.9, 2.3$  Hz, 2H, Ar-H), 7.12 (dd,  $J = 9.9, 2.3$  Hz, 1H, Ar-H), 6.95 (s, 1H, OH), 6.76 (dt,  $J = 9.5, 2.3$  Hz, 1H, Ar-H). <sup>13</sup>C NMR (100 MHz, DMSO-*d*<sub>6</sub>):  $\delta$  166.4 (d,  $J = 252.5$  Hz), 163.2, 162.8 (d,  $J = 244.4$  Hz), 159.2 (d,  $J = 234.9$  Hz), 158.8, 149.7 (d,  $J = 13.2$  Hz), 139.4 (d,  $J = 12.7$  Hz), 137.2 (d,  $J = 12.6$  Hz), 131.9 (d,  $J = 2.8$  Hz), 130.0 (d,  $J = 11.0$  Hz), 127.1 (d,  $J = 9.9$  Hz), 125.2 (d,  $J = 3.0$  Hz), 122.0, 121.5 (d,  $J = 10.1$  Hz), 118.7 (d,  $J = 10.7$  Hz), 116.5 (d,  $J = 23.5$  Hz), 115.6, 114.1 (d,  $J = 22.6$  Hz), 113.7 (d,  $J = 22.2$  Hz), 108.0 (d,  $J = 24.3$  Hz), 104.7 (d,  $J = 29.0$  Hz), 98.1 (d,  $J = 25.4$  Hz), 77.0. MS (ESI): 420 (M+H<sup>+</sup>, 100). Anal calcd for C<sub>23</sub>H<sub>12</sub>F<sub>3</sub>N<sub>3</sub>O<sub>2</sub>: C, 65.87; H, 2.88; N, 10.02. Found C, 65.70; H, 2.97; N, 9.76.

3,9-Dichloro-6-(6-chloro-1*H*-indol-3-yl)-6-hydroxyindolo[2,1-*b*]quinazolin-12(6*H*)-one (**6i**)

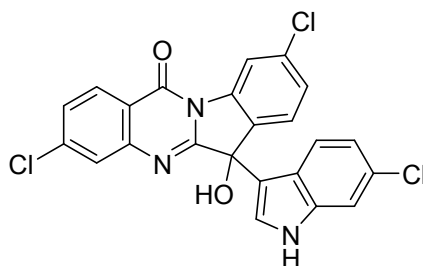

Yellow amorphous solid, 32.5 mg, 69% yield.  $^1\text{H}$  NMR (400 MHz,  $\text{DMSO-}d_6$ ):  $\delta$  11.28 (s, 1H, NH), 8.50 (s, 1H, Ar-H), 8.28 (s, 1H, Ar-H), 7.78 (s, 1H, Ar-H), 7.65 (s, 1H, Ar-H), 7.55 (s, 1H, Ar-H), 7.47 (dd,  $J = 9.8, 5.9$  Hz, 2H, Ar-H), 7.40 (s, 1H, Ar-H), 7.23 (s, 1H, Ar-H), 7.01 (s, 1H, OH), 6.94 (s, 1H, Ar-H).  $^{13}\text{C}$  NMR (100 MHz,  $\text{DMSO-}d_6$ ):  $\delta$  162.8, 158.9, 148.6, 140.1, 139.4, 137.7, 134.7, 134.3, 128.9, 128.4, 127.5, 127.4, 127.0, 126.6, 125.7, 124.0, 122.2, 120.6, 119.8, 116.7, 115.4, 111.7, 77.0. MS (ESI): 468 ( $\text{M}+\text{H}^+$ , 100), 470 ( $\text{M}+\text{H}^+$ , 100), 472 ( $\text{M}+\text{H}^+$ , 30). Anal calcd for  $\text{C}_{23}\text{H}_{12}\text{Cl}_3\text{N}_3\text{O}_2$ : C, 58.94; H, 2.58; N, 8.97. Found C, 59.06; H, 2.73; N, 8.66.

4,10-Dichloro-6-(7-chloro-1H-indol-3-yl)-6-hydroxyindolo[2,1-b]quinazolin-12(6H)-one (**6j**)

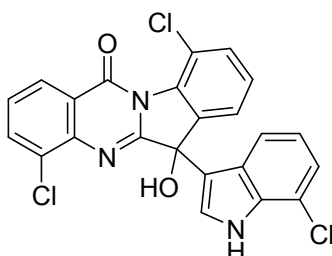

Yellow amorphous solid, 34.4 mg, 73% yield.  $^1\text{H}$  NMR (400 MHz,  $\text{DMSO-}d_6$ ):  $\delta$  11.55 (s, 1H, NH), 8.18 (dd,  $J = 7.8, 1.3$  Hz, 1H, Ar-H), 7.97 (d,  $J = 7.8$  Hz, 1H, Ar-H), 7.64 (t,  $J = 8.0$  Hz, 2H, Ar-H), 7.54 (t,  $J = 8.0$  Hz, 2H, Ar-H), 7.44 (t,  $J = 7.8$  Hz, 1H, Ar-H), 7.16 (s, 1H, Ar-H), 7.15 (d,  $J = 8.0$  Hz, 1H, Ar-H), 7.02 (s, 1H, OH), 6.96 (t,  $J = 8.0$  Hz, 1H, Ar-H).  $^{13}\text{C}$  NMR (100 MHz,  $\text{DMSO-}d_6$ ):  $\delta$  162.5, 157.6, 143.8, 139.7, 135.6, 135.4, 134.2, 132.9, 131.1, 129.3, 128.5, 127.1, 126.2, 125.8, 124.4, 124.3, 121.6, 121.4, 120.5, 120.4, 116.8, 116.4, 77.4. MS (ESI): 468 ( $\text{M}+\text{H}^+$ , 100), 470 ( $\text{M}+\text{H}^+$ , 100), 472 ( $\text{M}+\text{H}^+$ , 30). Anal calcd for  $\text{C}_{23}\text{H}_{12}\text{Br}_3\text{N}_3\text{O}_2$ : C, 58.94; H, 2.58; N, 8.97. Found C, 58.79; H, 2.67; N, 8.82.

4,10-Dibromo-6-(7-bromo-1H-indol-3-yl)-6-hydroxyindolo[2,1-b]quinazolin-12(6H)-one (**6k**)

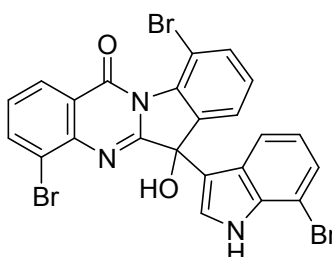

Yellow amorphous solid, 43.6 mg, 72% yield.  $^1\text{H}$  NMR (400 MHz,  $\text{DMSO-}d_6$ ):  $\delta$  11.38 (d,  $J = 2.3$  Hz, 1H, NH), 8.20 (dd,  $J = 7.9, 1.2$  Hz, 1H, Ar-H), 8.13 (dd,  $J = 7.9, 1.3$  Hz, 1H, Ar-H), 7.84 (d,  $J = 7.9$  Hz, 1H, Ar-H), 7.82 (d,  $J = 7.9$  Hz, 1H, Ar-H), 7.61 (dd,  $J = 7.4, 1.2$  Hz, 1H, Ar-H), 7.47 (t,  $J = 7.9$  Hz, 1H, Ar-H), 7.37 (t,  $J = 7.9$  Hz, 1H, Ar-H), 7.30 (d,  $J = 7.1$  Hz, 1H, Ar-H), 7.06 (d,  $J = 2.3$  Hz, 1H, Ar-H), 7.00 (s, 1H, OH), 6.94 (t,  $J = 7.9$  Hz, 1H, Ar-H).  $^{13}\text{C}$  NMR (100 MHz,  $\text{DMSO-}d_6$ ):  $\delta$  162.5, 157.5, 144.8, 139.9, 138.6, 137.6, 136.1, 135.7, 129.5, 128.9, 127.0, 126.8, 125.7,

124.7, 124.6, 124.3, 121.9, 121.6, 120.8, 116.9, 109.4, 104.6, 77.5. MS (ESI): 600 (M+H<sup>+</sup>, 30), 602 (M+H<sup>+</sup>, 100), 604 (M+H<sup>+</sup>, 100). Anal calcd for C<sub>23</sub>H<sub>12</sub>Br<sub>3</sub>N<sub>3</sub>O<sub>2</sub>: C, 45.88; H, 2.01; N, 6.98. Found C, 46.02; H, 2.31; N, 6.79.

2,2''-Dimethyl-3'-oxo-(3,2':2',3''-terindoline)-1'-carbaldehyde (**8a**)

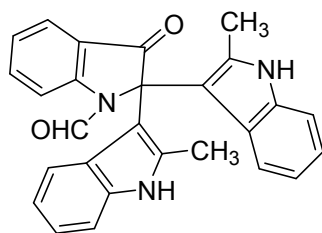

Yellow solid, 285-288 °C (from CH<sub>2</sub>Cl<sub>2</sub>), 30.6 mg, 73% yield. <sup>1</sup>H NMR (400 MHz, DMSO-*d*<sub>6</sub>): δ 8.67 (s, 1H, CHO), 8.64 (d, *J* = 8.3 Hz, 1H, Ar-H), 8.45-8.35 (bs, 2H, NH), 7.83 (d, *J* = 7.5 Hz, 1H, Ar-H), 7.77 (dt, *J* = 1.2, 8.3 Hz, 1H, Ar-H), 7.30 (t, *J* = 7.5 Hz, 1H, Ar-H), 7.21 (d, *J* = 7.5 Hz, 2H, Ar-H), 7.19 (d, *J* = 7.9 Hz, 1H, Ar-H), 7.04 (t, *J* = 8.3 Hz, 2H, Ar-H), 6.93 (d, *J* = 8.1 Hz, 1H, Ar-H), 6.88 (d, *J* = 8.1 Hz, 1H, Ar-H), 6.83 (d, *J* = 7.9 Hz, 1H, Ar-H), 2.08 (s, 3H, CH<sub>3</sub>), 2.04 (s, 3H, CH<sub>3</sub>). <sup>13</sup>C NMR (100 MHz, CDCl<sub>3</sub>): δ 195.9, 162.2, 150.0, 137.4, 135.2, 135.1, 134.9, 134.4, 127.6, 126.7, 125.3, 125.2, 123.4, 121.5, 121.4, 120.3, 120.2, 119.9, 119.8, 117.7, 110.6, 110.5, 107.9, 107.2, 71.3, 14.2, 14.0. MS (ESI): 420 (M+H<sup>+</sup>, 100). Anal calcd for C<sub>27</sub>H<sub>21</sub>N<sub>3</sub>O<sub>2</sub>: C, 77.31; H, 5.05; N, 10.02. Found C, 77.16; H, 5.40; N, 9.83.

5,5',5''-Trichloro-2,2''-dimethyl-3'-oxo-(3,2':2',3''-terindoline)-1'-carbaldehyde (**8b**)

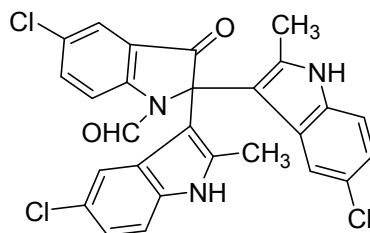

Yellow solid, 212-215 °C (from EtOAc/PE = 1:1), 35.2 mg, 67% yield. <sup>1</sup>H NMR (400 MHz, CDCl<sub>3</sub>): δ 8.60 (d, *J* = 8.7 Hz, 1H, Ar-H), 8.56 (s, 1H, CHO), 8.40 (s, 1H, NH), 8.37 (s, 1H, NH), 7.79 (d, *J* = 2.1 Hz, 1H, Ar-H), 7.75 (dd, *J* = 8.7, 2.1 Hz, 1H, Ar-H), 7.16 (dd, *J* = 8.8, 2.8 Hz, 2H, Ar-H), 7.05-7.01 (m, 3H, Ar-H), 6.86 (d, *J* = 1.7 Hz, 1H, Ar-H), 2.12 (s, 3H, CH<sub>3</sub>), 2.06 (s, 3H, CH<sub>3</sub>). <sup>13</sup>C NMR (100 MHz, CDCl<sub>3</sub>): δ 193.8, 161.5, 148.1, 137.5, 136.2, 135.7, 133.5, 133.4, 131.2, 128.2, 127.7, 126.2, 126.1, 125.0, 124.4, 122.4, 122.2, 119.2, 119.1, 118.9, 111.8, 111.7, 106.8, 106.3, 71.2, 14.3, 14.1. MS (ESI): 522 (M+H<sup>+</sup>, 100), 524 (M+H<sup>+</sup>, 100), 526 (M+H<sup>+</sup>, 30). Anal calcd for C<sub>27</sub>H<sub>18</sub>Cl<sub>3</sub>N<sub>3</sub>O<sub>2</sub>: C, 62.03; H, 3.47; N, 8.04. Found C, 62.35; H, 3.61; N, 7.73.

2,2'',5,5',5''-Pentamethyl-3'-oxo-(3,2':2',3''-terindoline)-1'-carbaldehyde (**8c**)

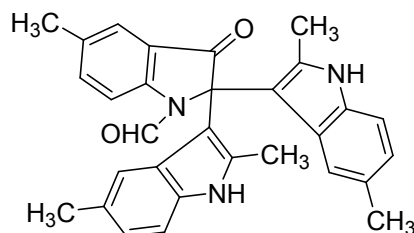

Yellow amorphous solid, 37.3 mg, 81% yield. <sup>1</sup>H NMR (400 MHz, DMSO-*d*<sub>6</sub>): δ 11.14 (s, 1H, NH), 11.09 (s, 1H, NH), 8.39 (s, 1H, CHO), 8.37 (d, *J* = 8.3 Hz, 1H, Ar-H), 7.70 (dd, *J* = 8.5, 1.5 Hz, 1H, Ar-H), 7.62 (s, 1H, Ar-H), 7.18 (t, *J* = 8.3 Hz, 2H, Ar-H), 6.81 (d, *J* = 8.3 Hz, 2H, Ar-H),

6.80 (s, 1H, Ar-H), 6.53 (s, 1H, Ar-H), 2.38 (s, 3H, CH<sub>3</sub>), 2.14 (s, 3H, CH<sub>3</sub>), 2.11 (s, 3H, CH<sub>3</sub>), 2.02 (s, 3H, CH<sub>3</sub>), 1.94 (s, 3H, CH<sub>3</sub>). <sup>13</sup>C NMR (100 MHz, DMSO-*d*<sub>6</sub>): δ 195.4, 161.5, 147.8, 138.8, 136.3, 135.5, 133.9, 127.8, 127.6, 127.3, 126.8, 125.0, 123.6, 122.5, 122.4, 119.6, 118.7, 117.1, 111.2, 111.0, 106.2, 105.6, 71.8, 22.1, 22.0, 20.9, 13.9, 13.8. HRESIMS calcd for [C<sub>30</sub>H<sub>27</sub>N<sub>3</sub>O<sub>2</sub> + Na<sup>+</sup>] 484.20010 (100%), found 484.19823 (100%).

6-Hydroxy-8-methoxy-6-(5-methoxy-1*H*-indol-3-yl)indolo[2,1-*b*]quinazolin-12(6*H*)-one (**10**)

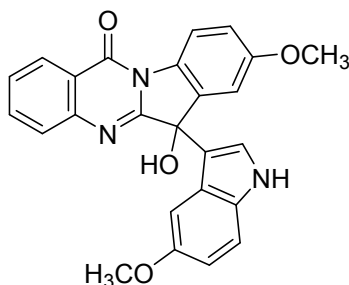

Yellow amorphous solid, 23.8 mg, 56% yield. <sup>1</sup>H NMR (400 MHz, DMSO-*d*<sub>6</sub>): δ 10.97 (s, 1H, NH), 8.46 (d, *J* = 8.8 Hz, 1H, Ar-H), 8.30 (dd, *J* = 7.9, 1.2 Hz, 1H, Ar-H), 7.84 (dt, *J* = 1.2, 8.4 Hz, 1H, Ar-H), 7.68 (d, *J* = 7.9 Hz, 1H, Ar-H), 7.59 (t, *J* = 7.9 Hz, 1H, Ar-H), 7.24 (d, *J* = 8.8 Hz, 1H, Ar-H), 7.21 (d, *J* = 2.6 Hz, 1H, Ar-H), 7.14 (dd, *J* = 8.8, 2.6 Hz, 1H, Ar-H), 7.08 (d, *J* = 2.6 Hz, 1H, Ar-H), 6.88 (s, 1H, OH), 6.75 (d, *J* = 2.3 Hz, 1H, Ar-H), 6.69 (dd, *J* = 8.8, 2.3 Hz, 1H, Ar-H), 3.78 (s, 3H, OCH<sub>3</sub>), 3.58 (s, 3H, OCH<sub>3</sub>). <sup>13</sup>C NMR (100 MHz, DMSO-*d*<sub>6</sub>): δ 162.0, 159.1, 158.8, 153.4, 147.6, 137.8, 135.1, 132.5, 132.0, 128.1, 127.8, 126.7, 125.5, 125.0, 121.7, 117.7, 115.6, 115.2, 112.8, 111.5, 111.2, 102.4, 77.5, 56.1, 55.6. MS (ESI): 426 (M+H<sup>+</sup>, 100). Anal calcd for C<sub>25</sub>H<sub>19</sub>N<sub>3</sub>O<sub>4</sub>: C, 70.58; H, 4.50; N, 9.88. Found C, 70.25; H, 4.73; N, 9.61.





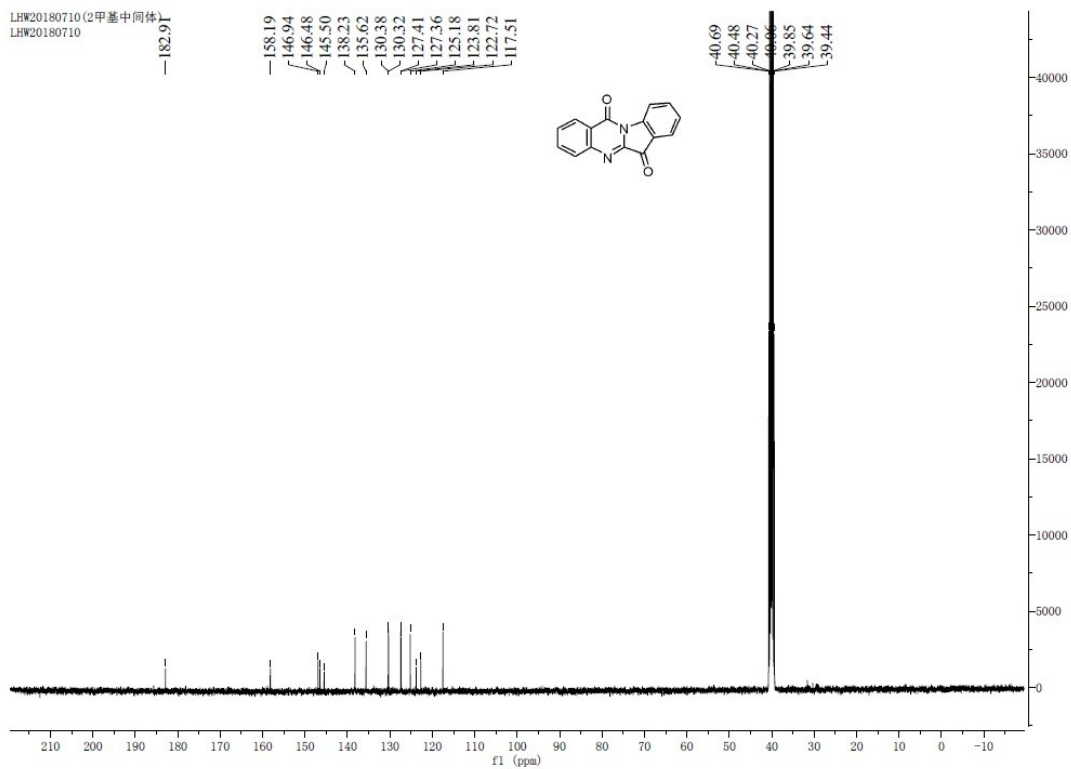

<sup>1</sup>H and <sup>13</sup>C NMR Spectra for 6a

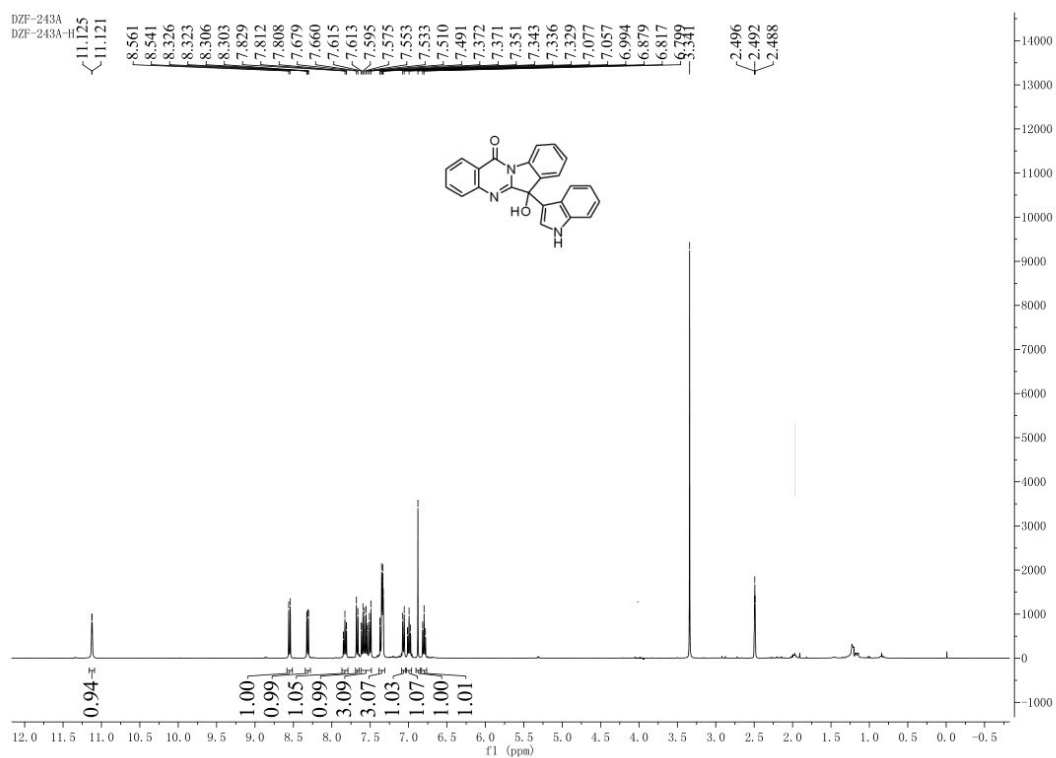

DZF-243A  
DZF-243A-H

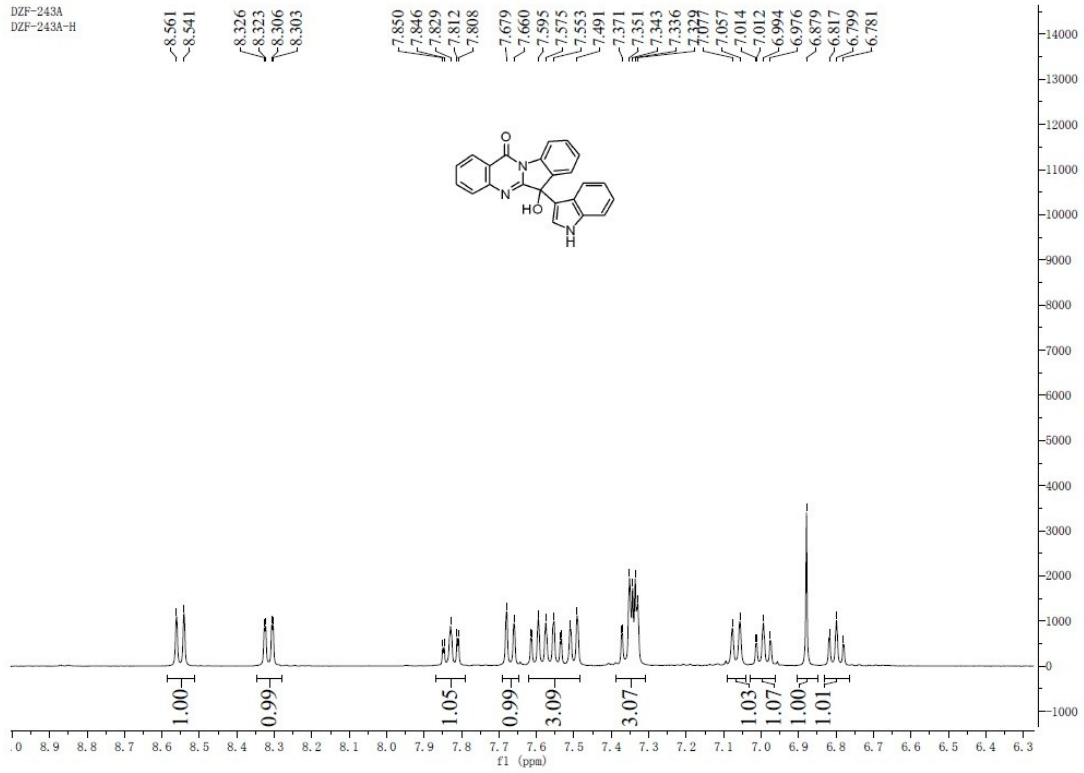

DZF-243A  
DZF-243A-C13

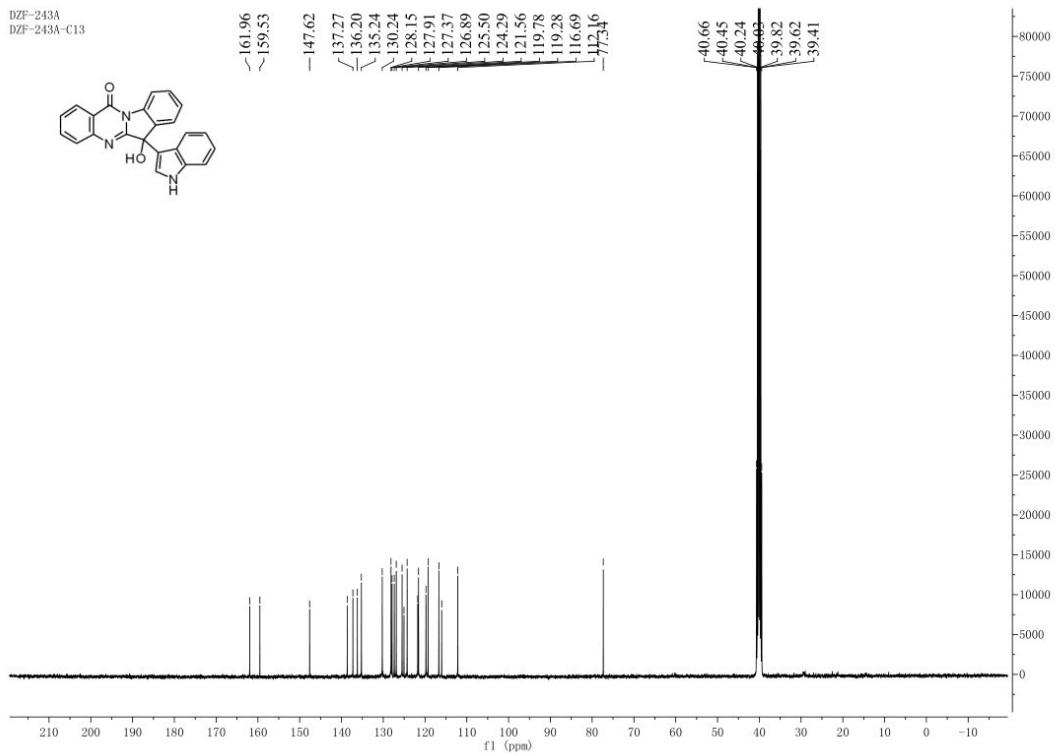

# <sup>1</sup>H and <sup>13</sup>C NMR Spectra for 6b

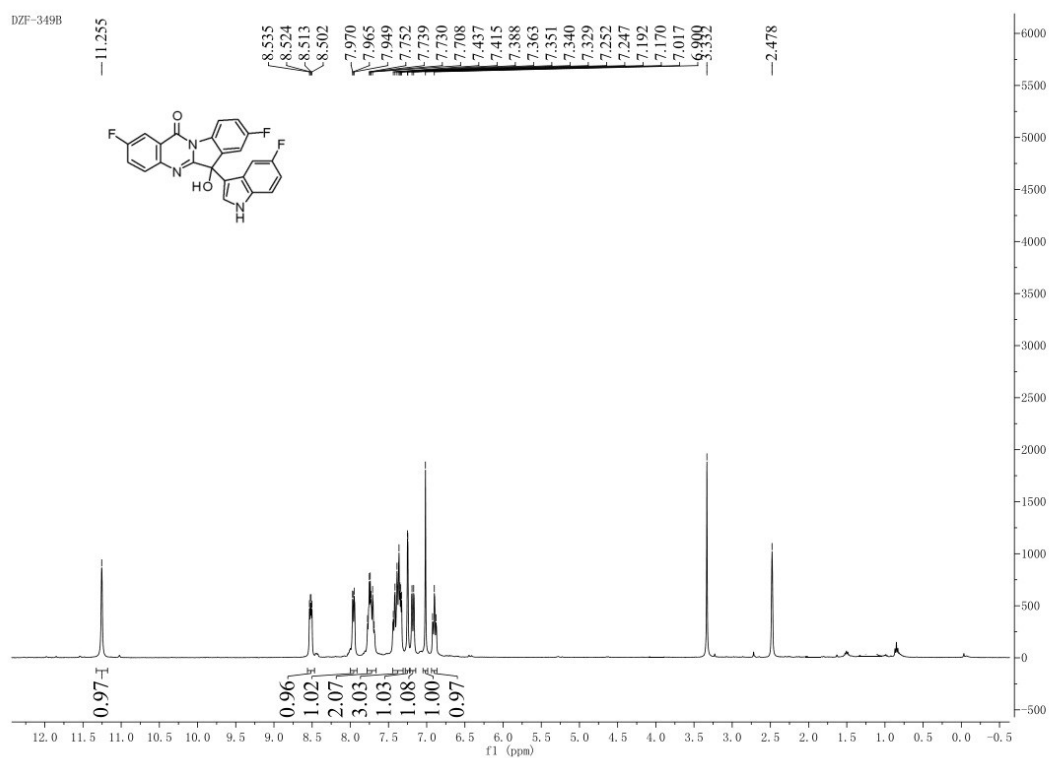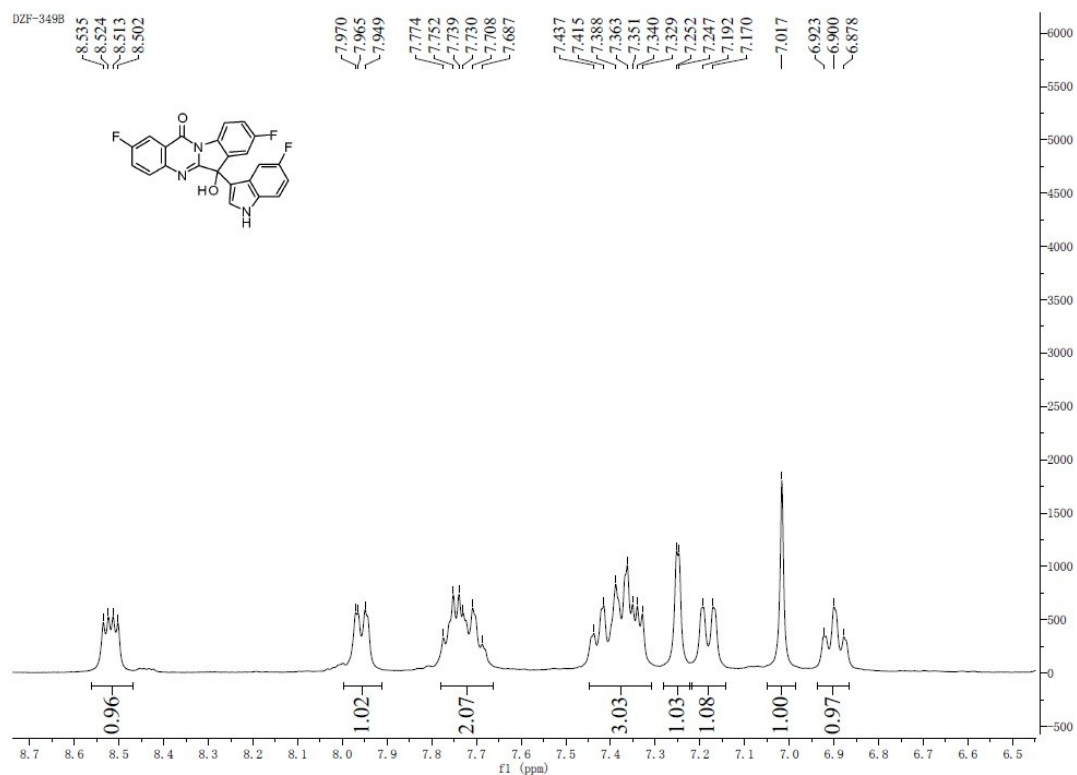

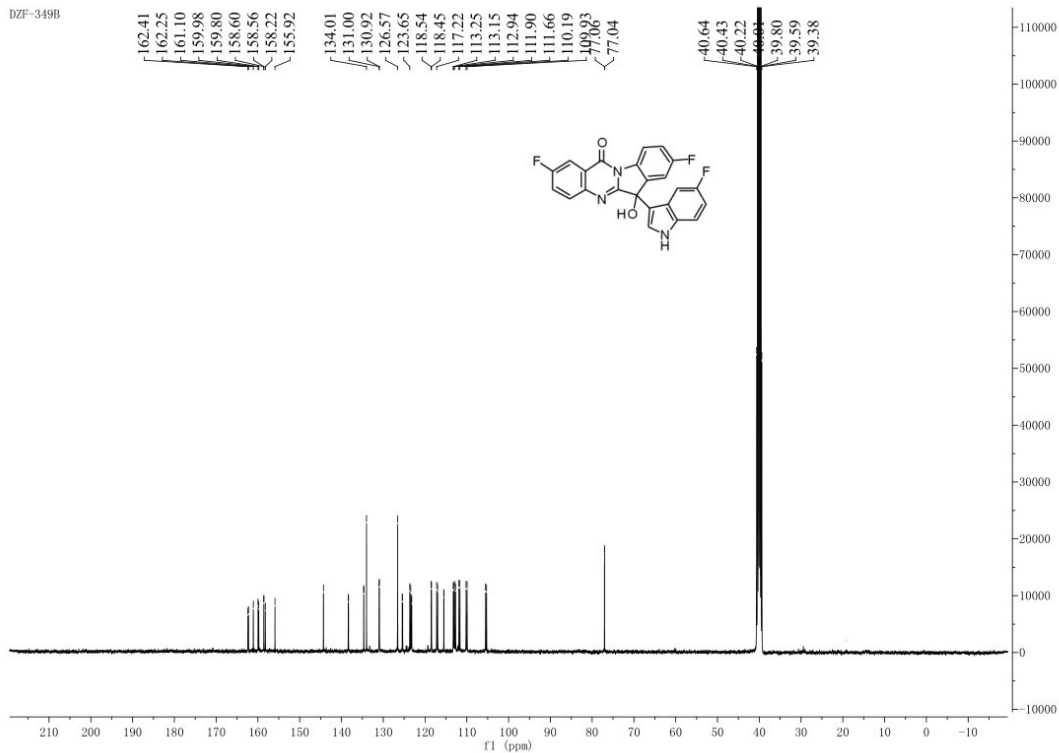

### $^1\text{H}$ and $^{13}\text{C}$ NMR Spectra for **6c**

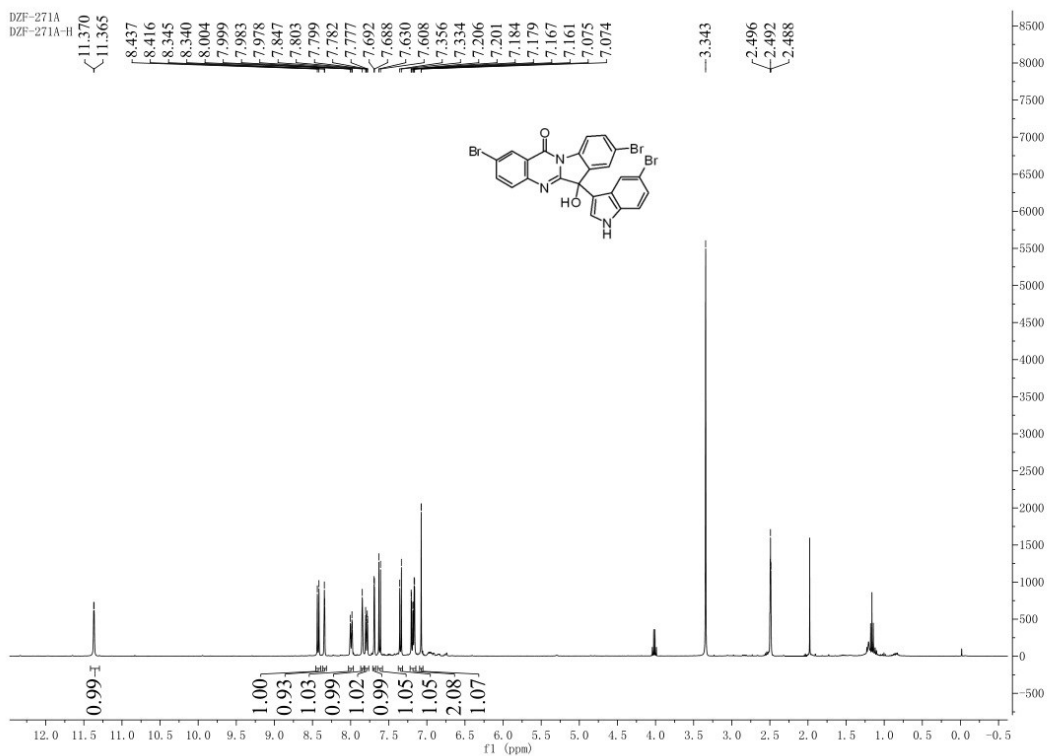

DZF-271A  
DZF-271A-H

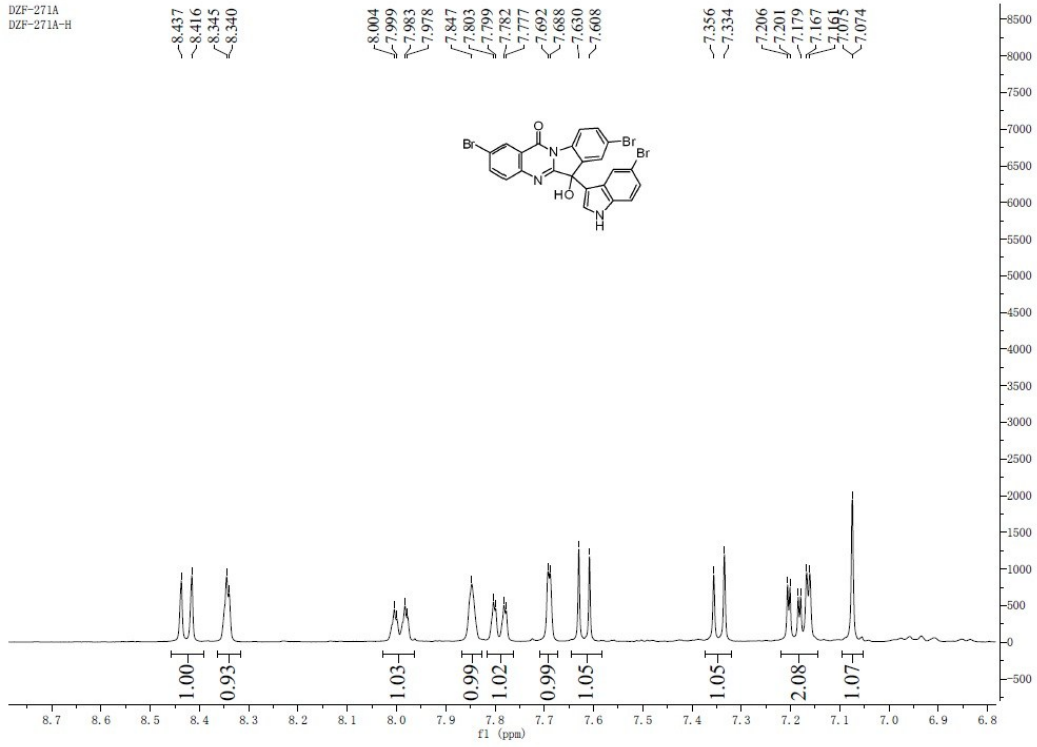

DZF-271A  
DZF-271A-C13

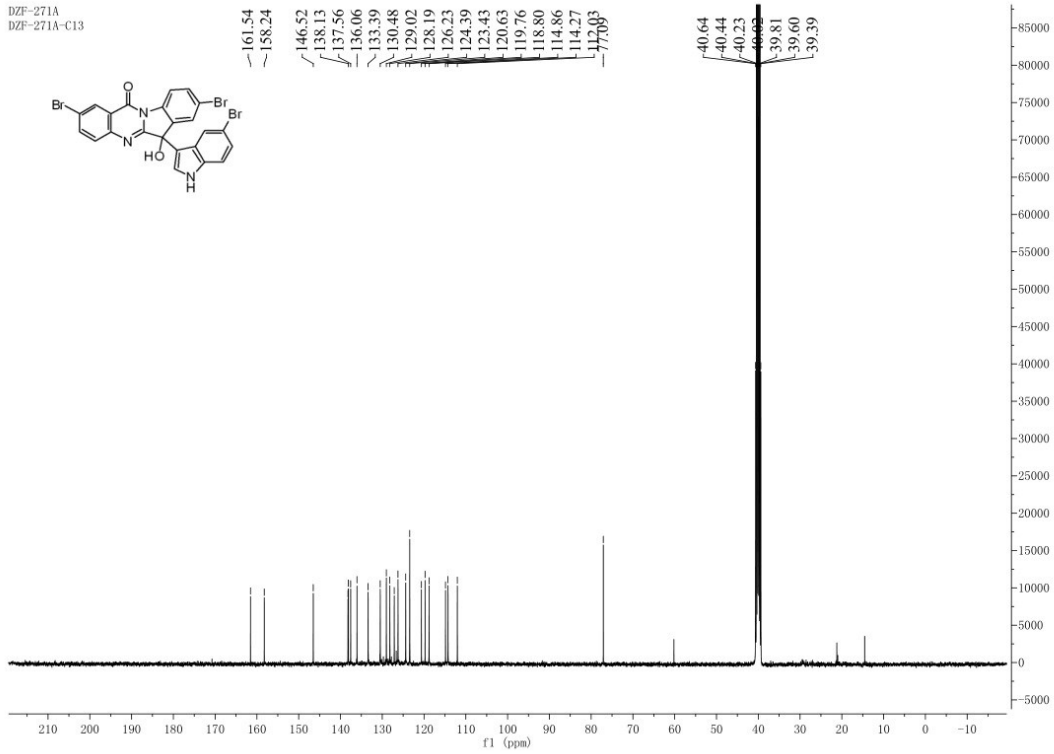

# <sup>1</sup>H and <sup>13</sup>C NMR Spectra for 6d

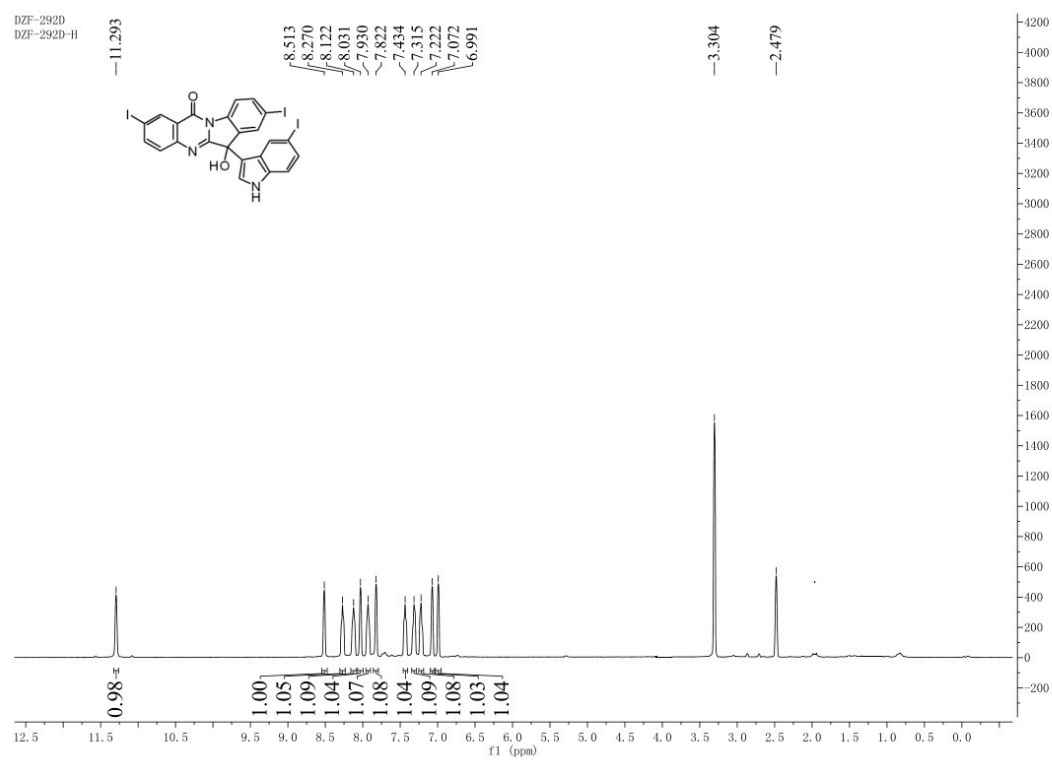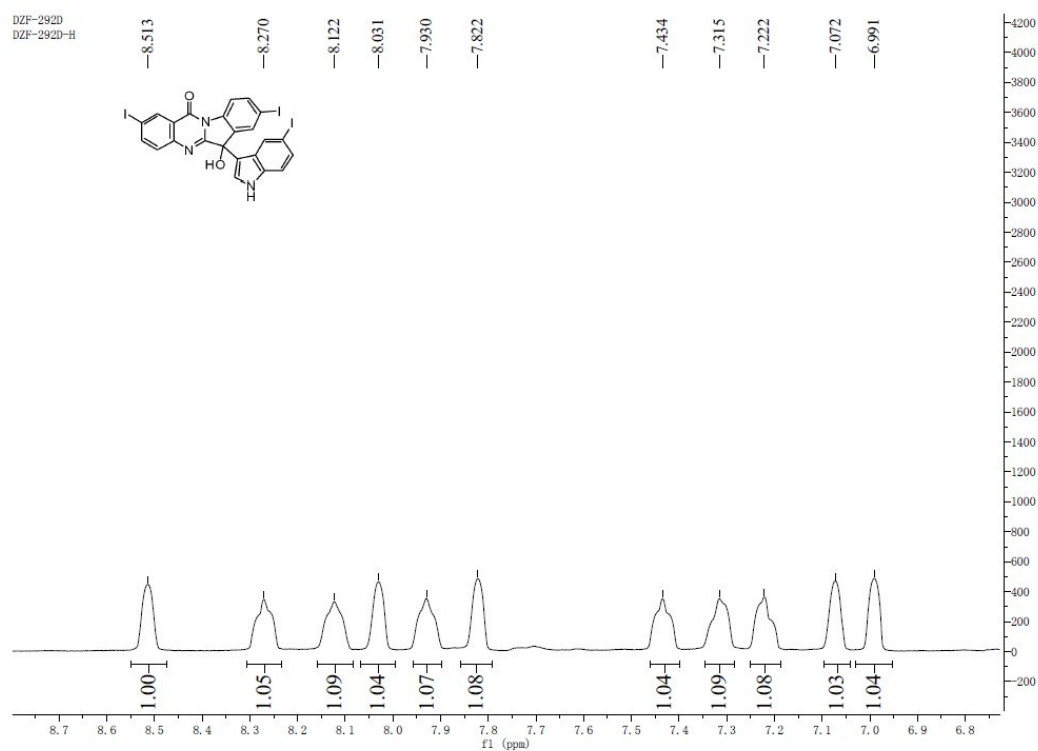

DZF-292D  
DZF-292D-C13

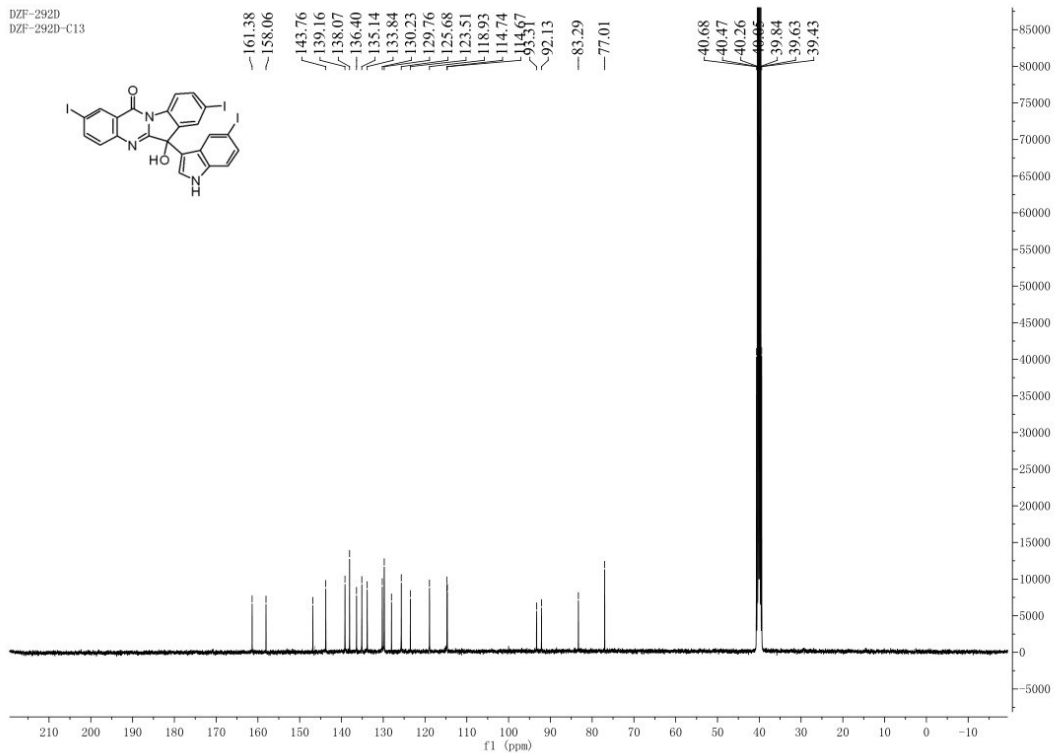

### <sup>1</sup>H and <sup>13</sup>C NMR Spectra for 6e

DZF-292A  
DZF-292A-H

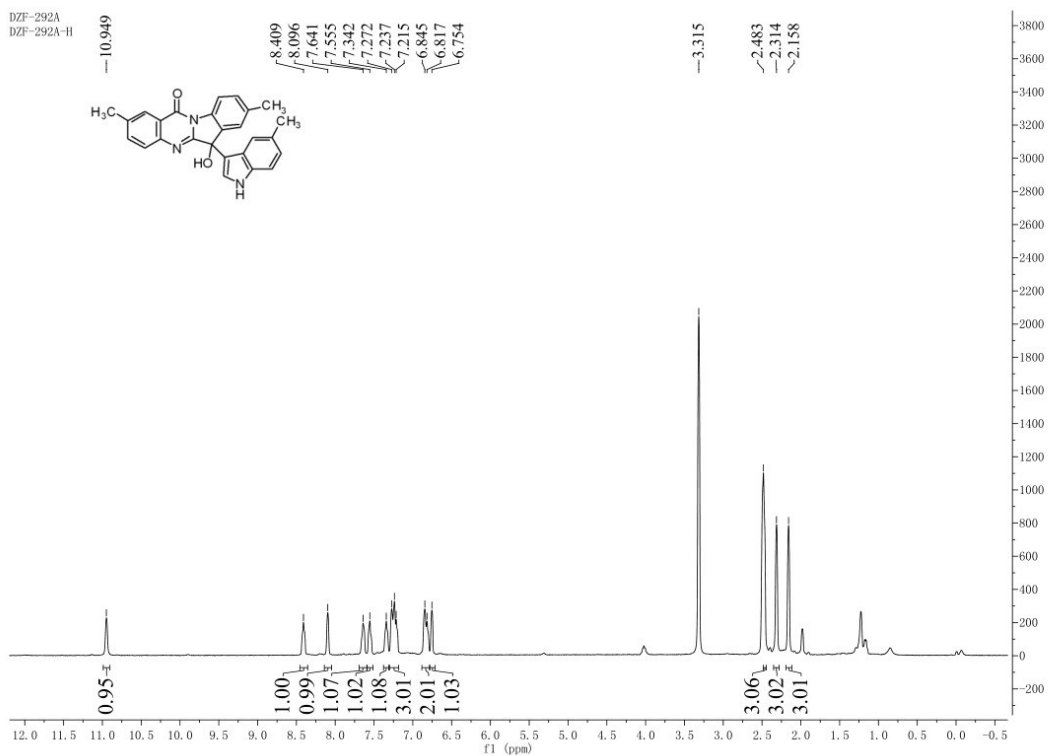



DZF-292A  
DZF-292A-H

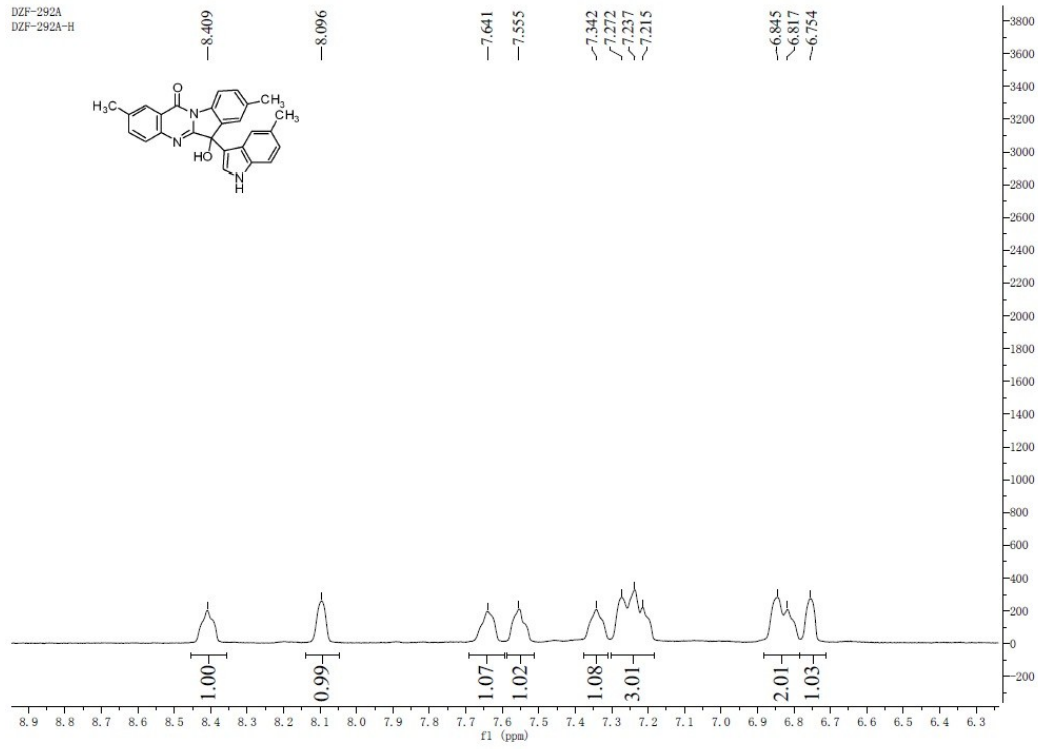

DZF-292A  
DZF-292A-C13

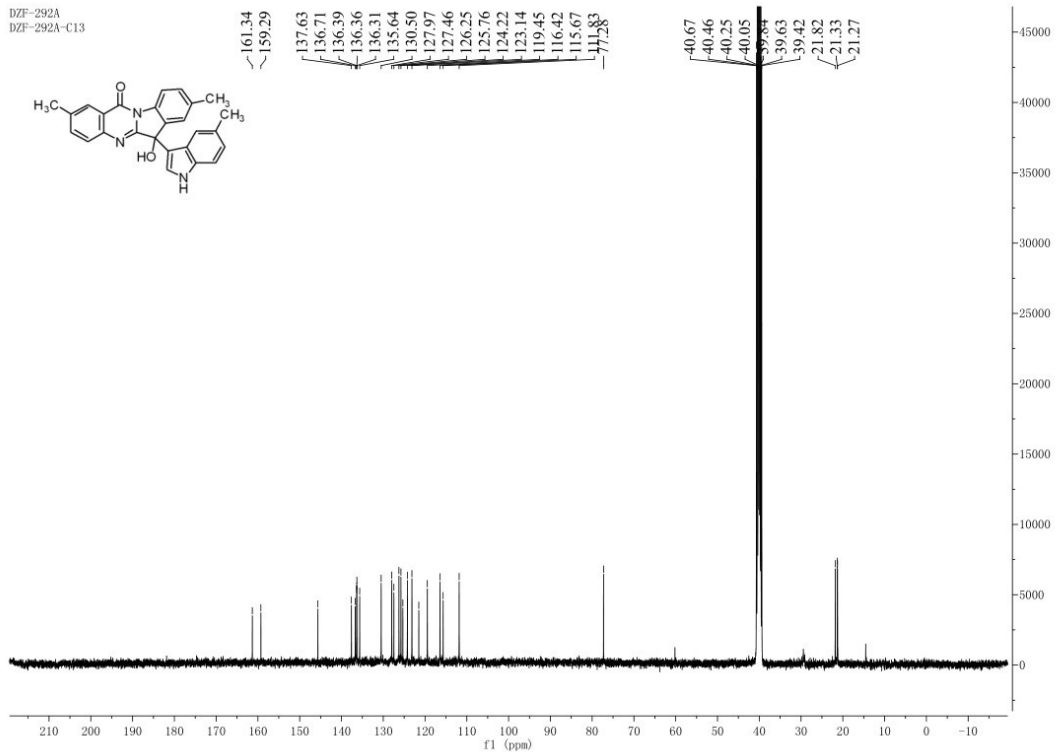

# <sup>1</sup>H and <sup>13</sup>C NMR Spectra for 6f

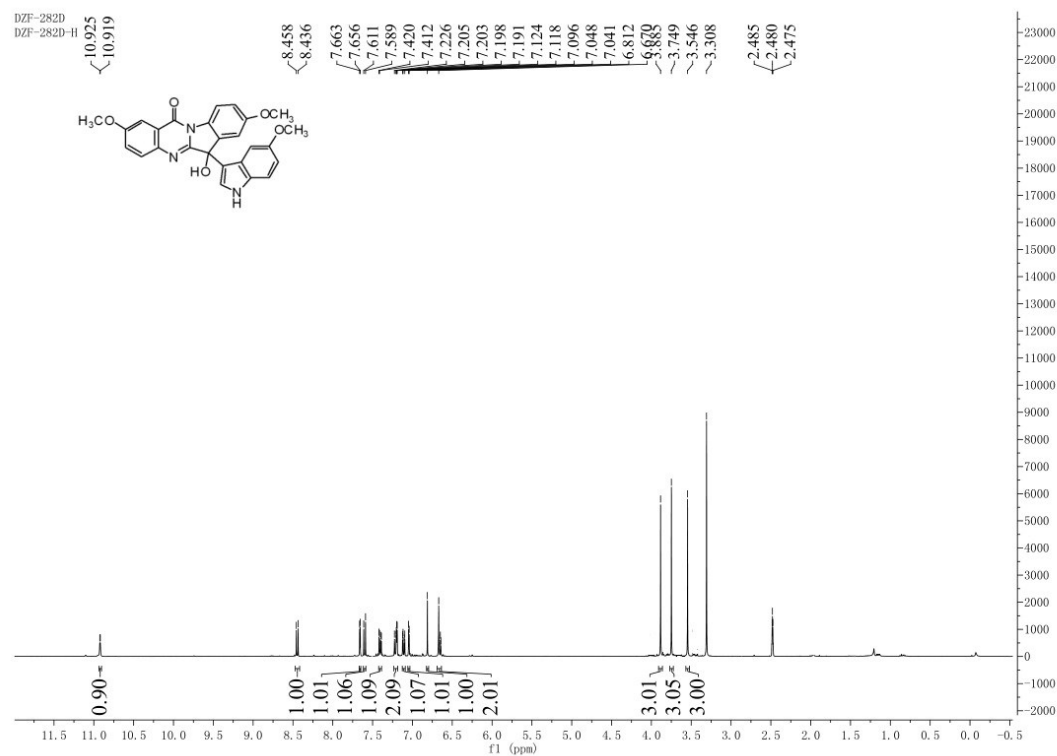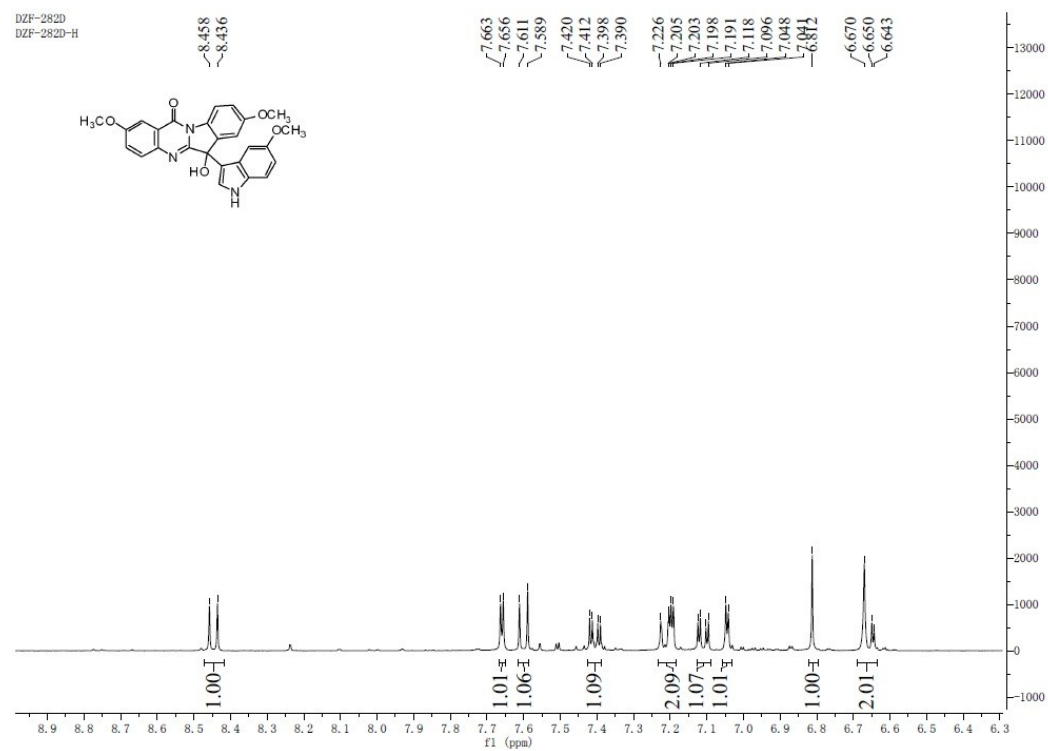

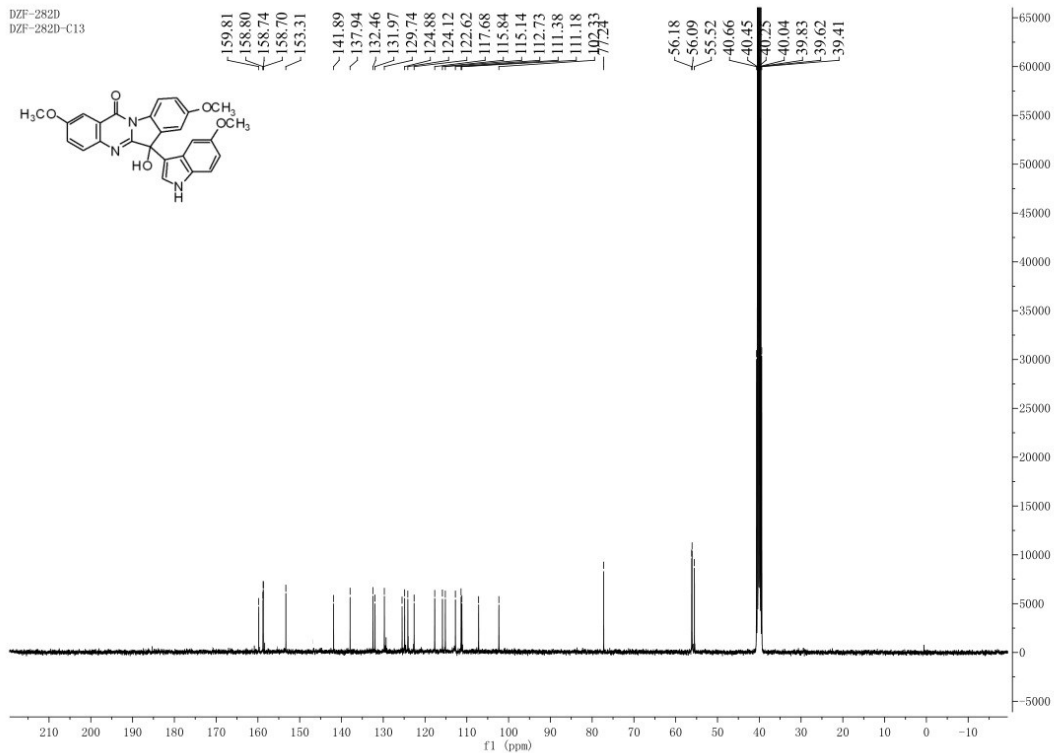

### $^1\text{H}$ and $^{13}\text{C}$ NMR Spectra for **6g**

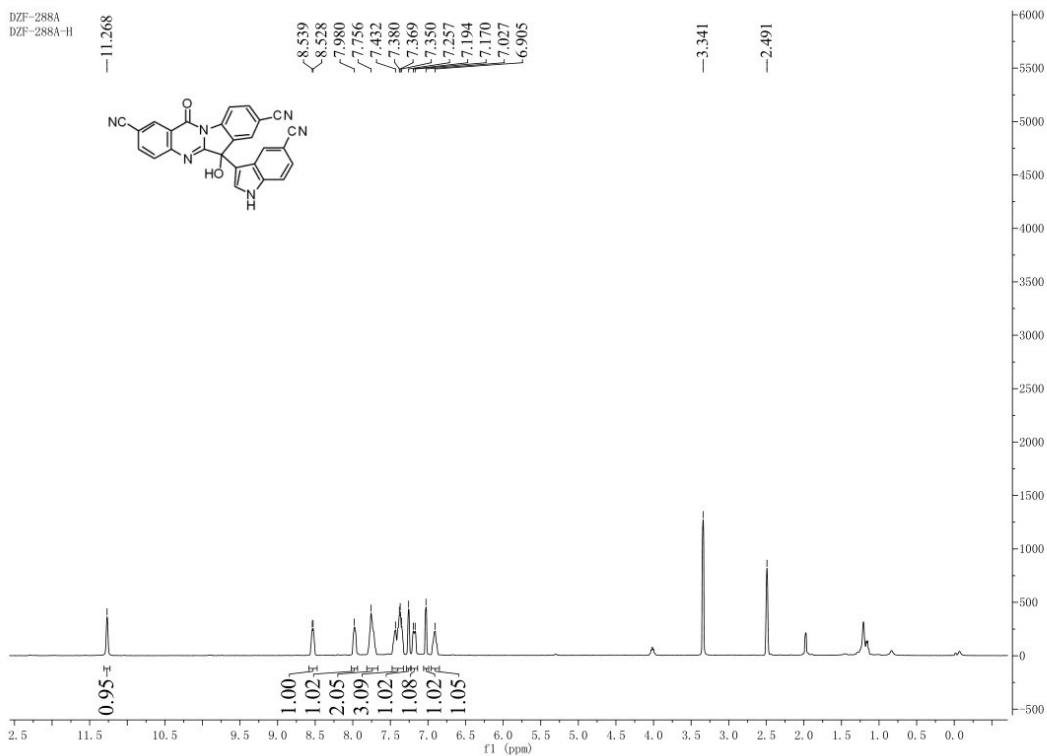

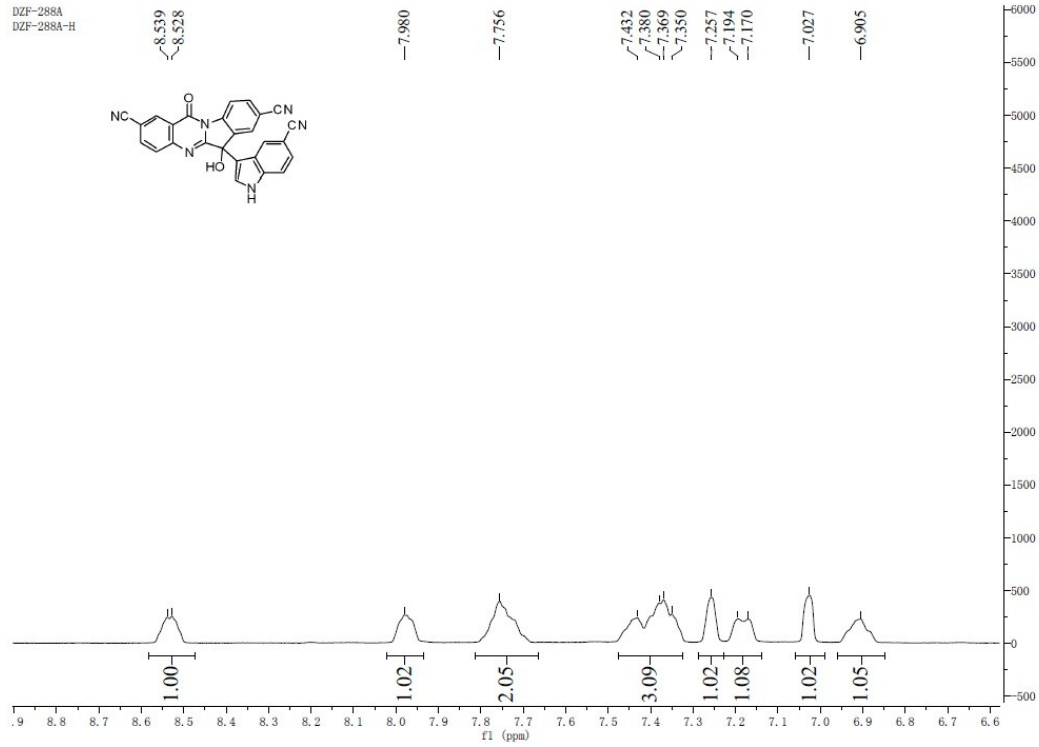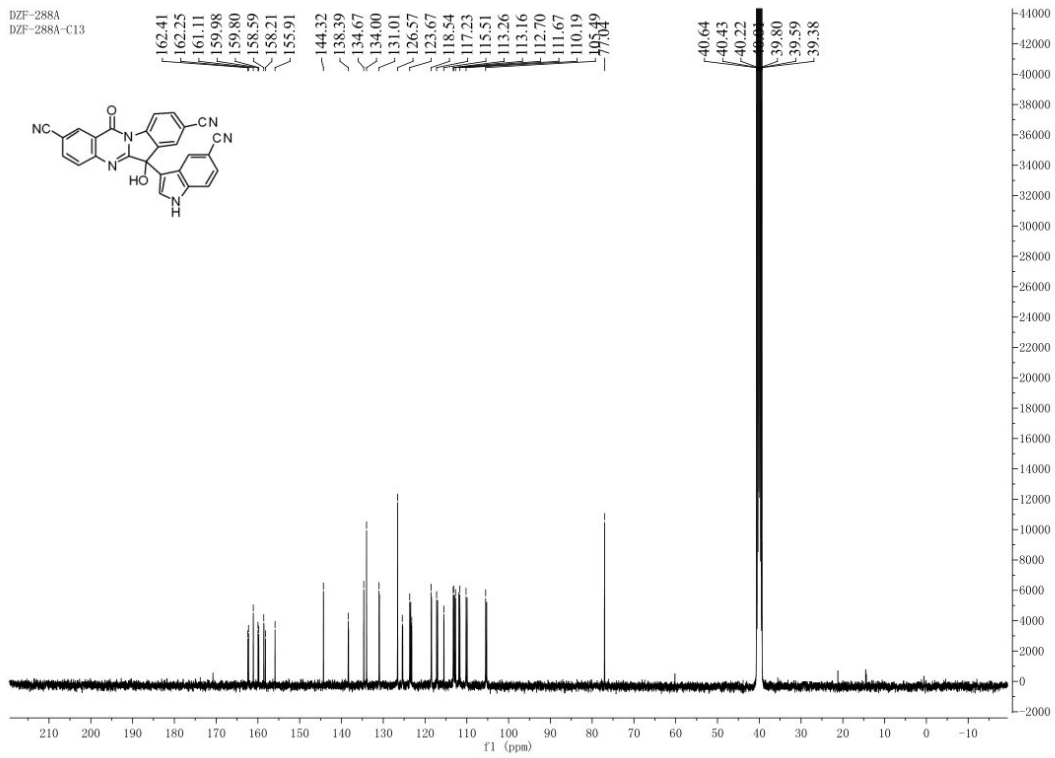

# <sup>1</sup>H and <sup>13</sup>C NMR Spectra for 6h

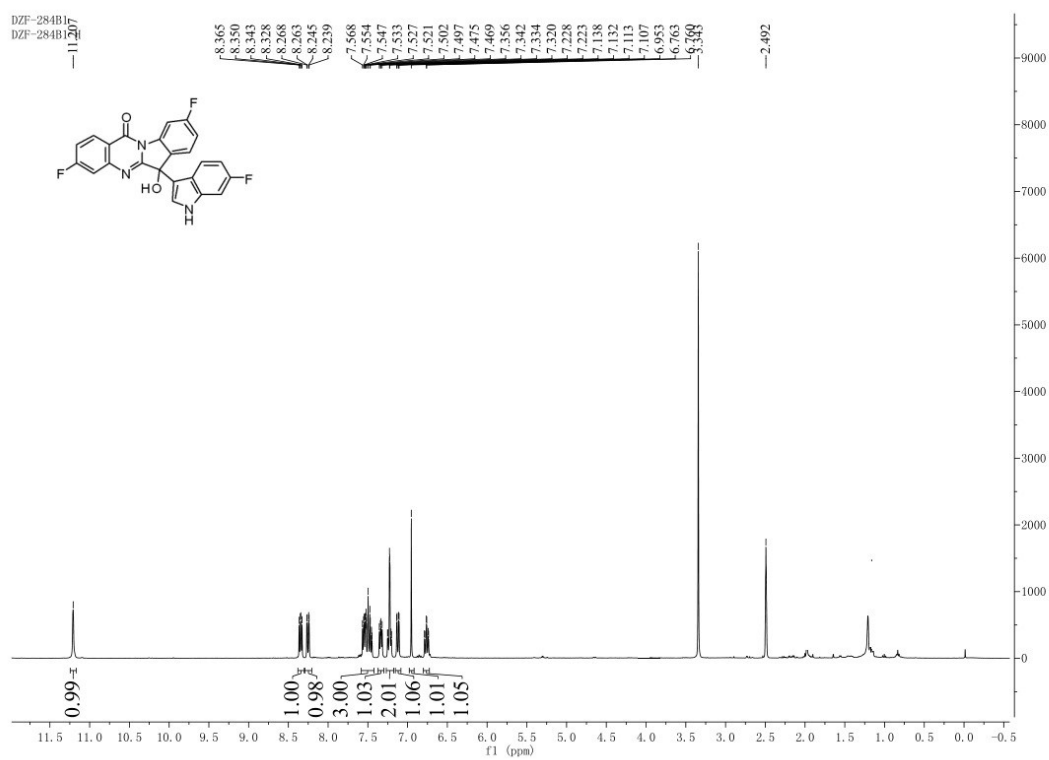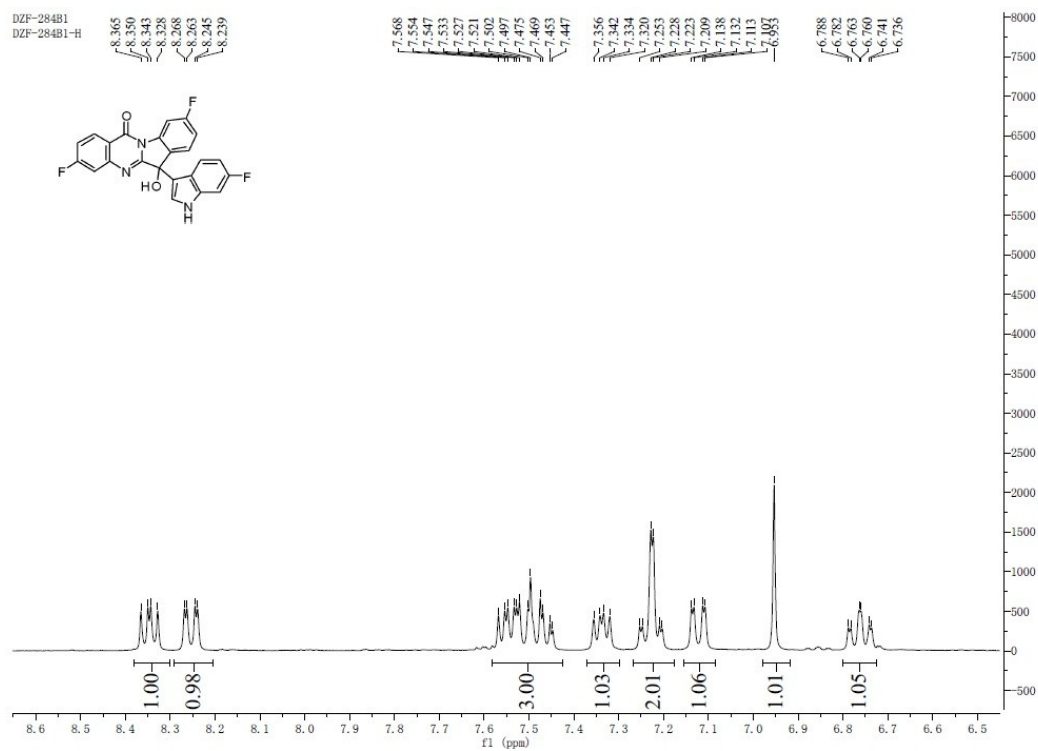

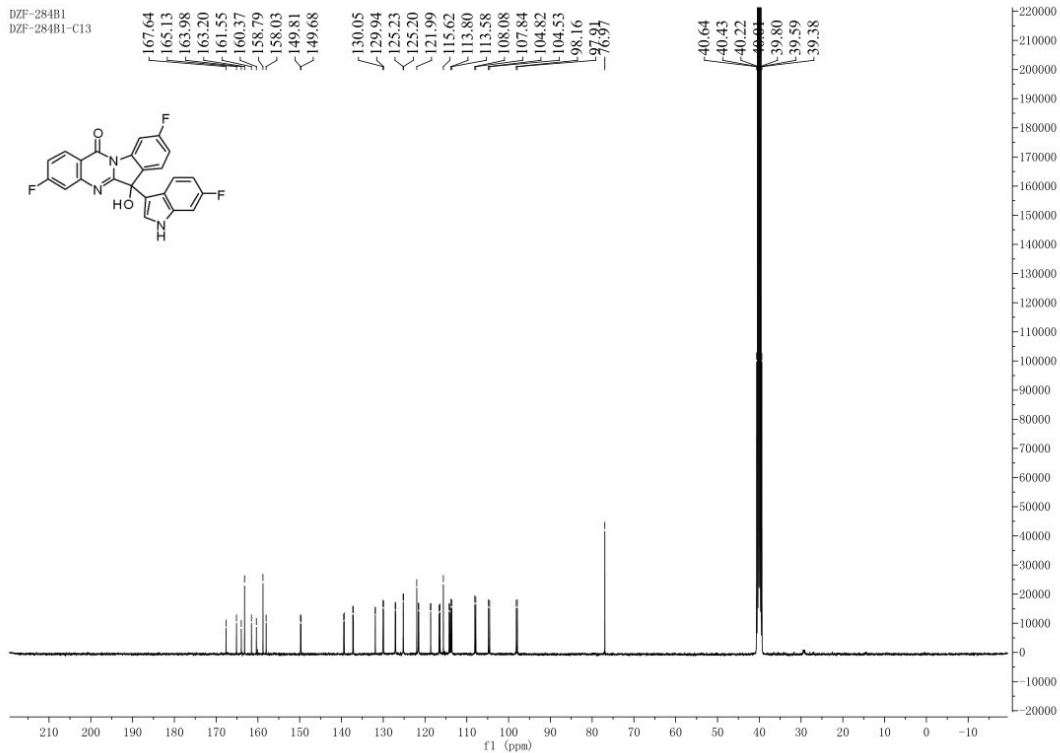

<sup>1</sup>H and <sup>13</sup>C NMR Spectra for **6i**

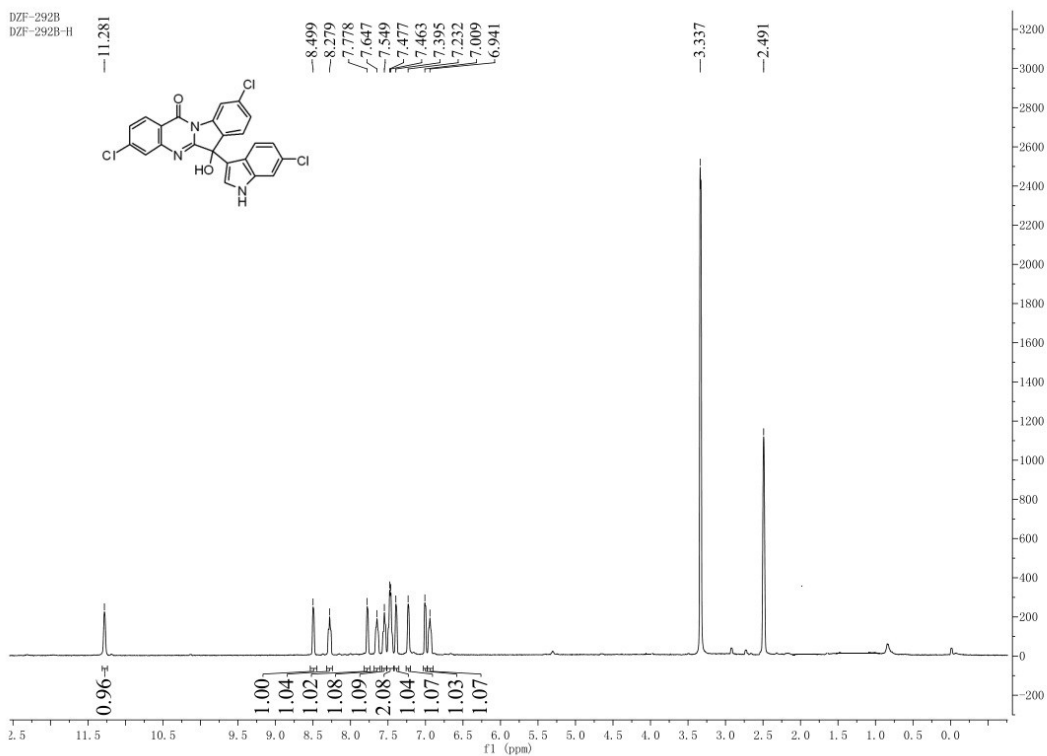

DZF-292B  
DZF-292B-H

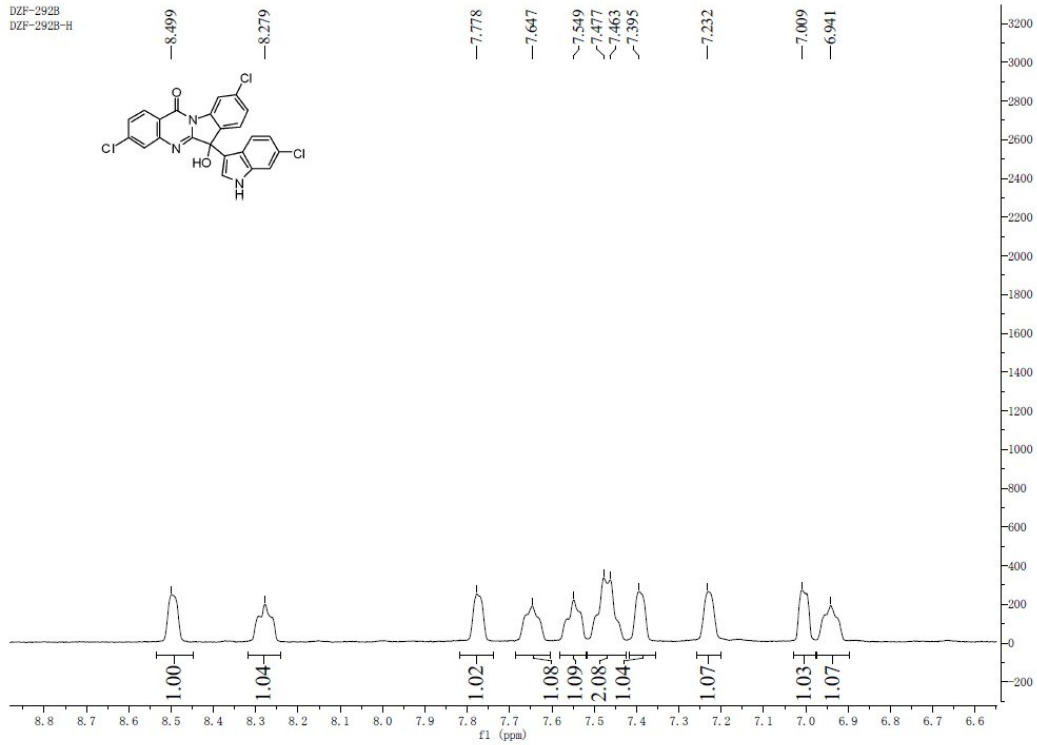

DZF-292B  
DZF-292B-C13

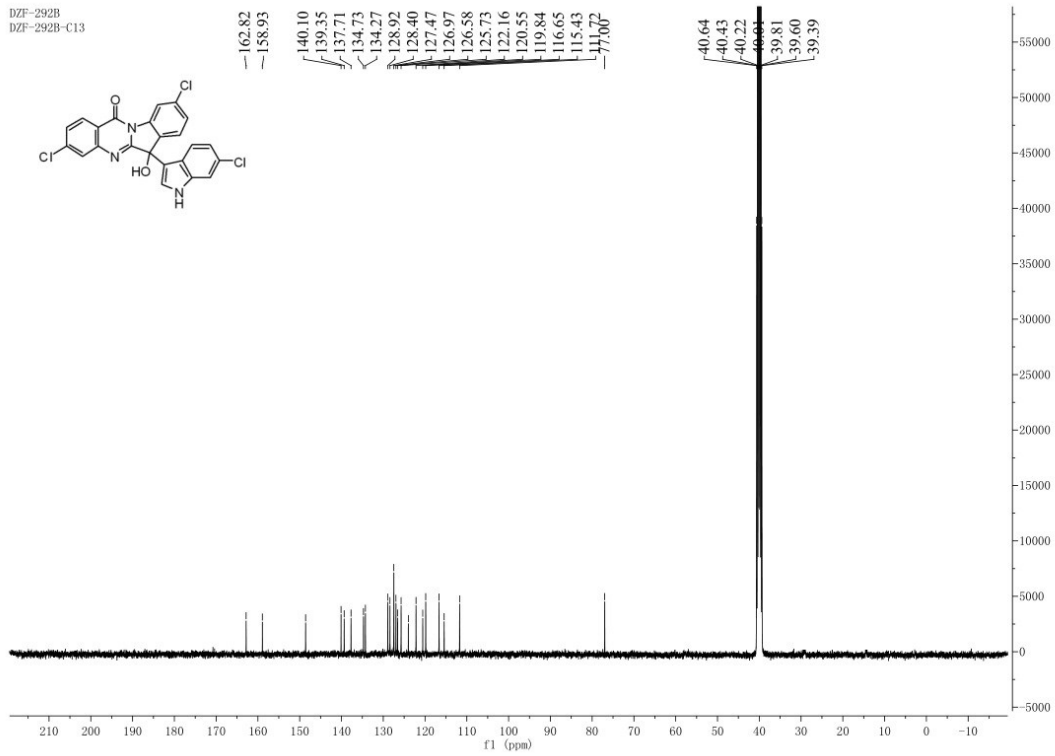

# <sup>1</sup>H and <sup>13</sup>C NMR Spectra for 6j

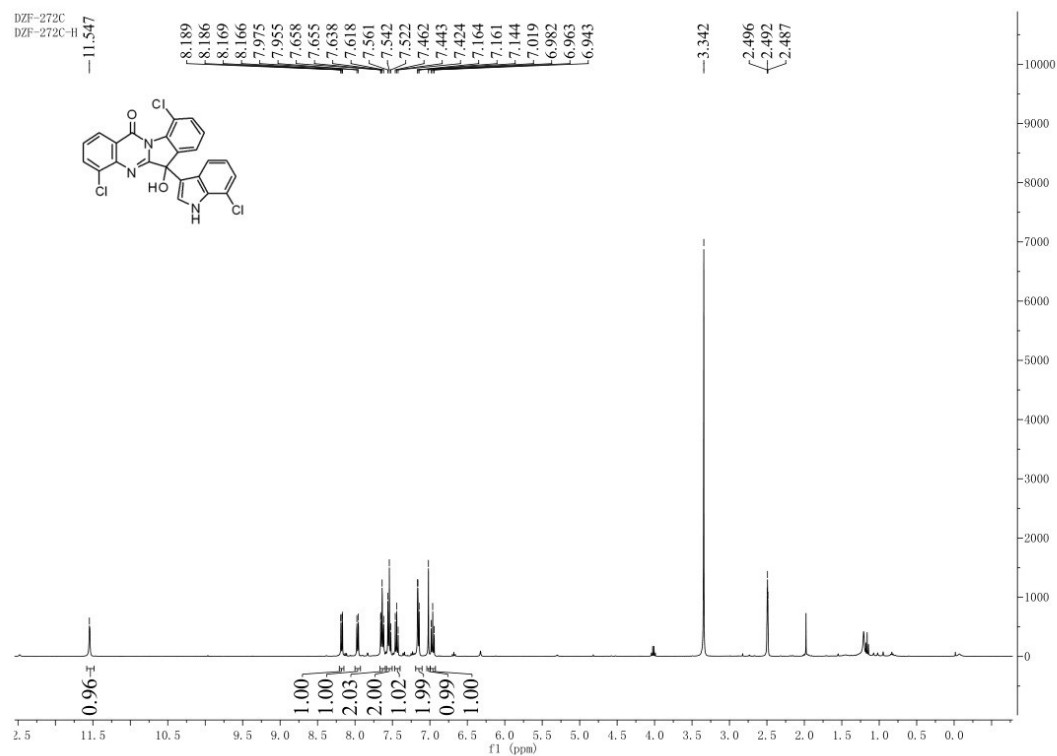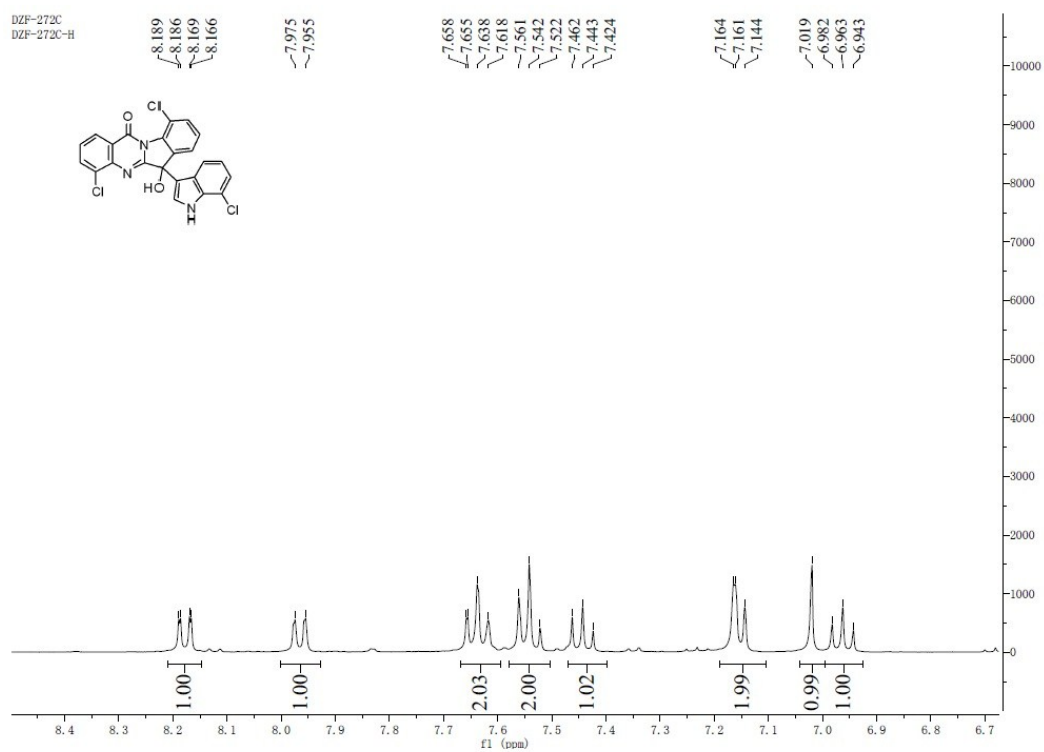



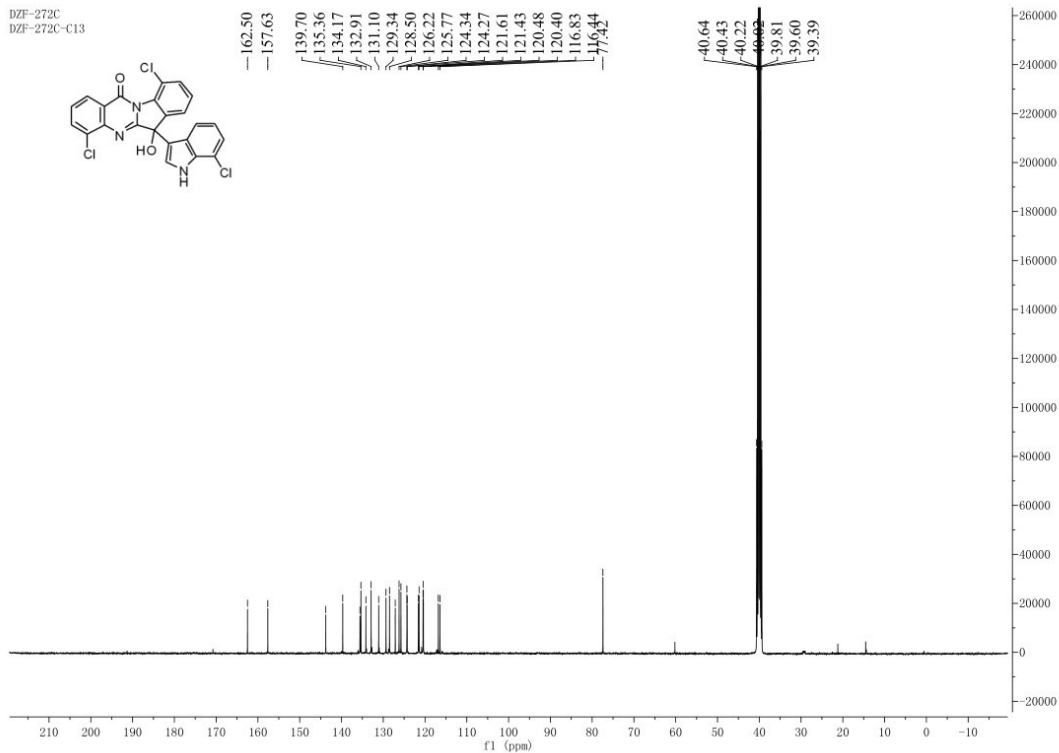

### $^1\text{H}$ and $^{13}\text{C}$ NMR Spectra for **6k**

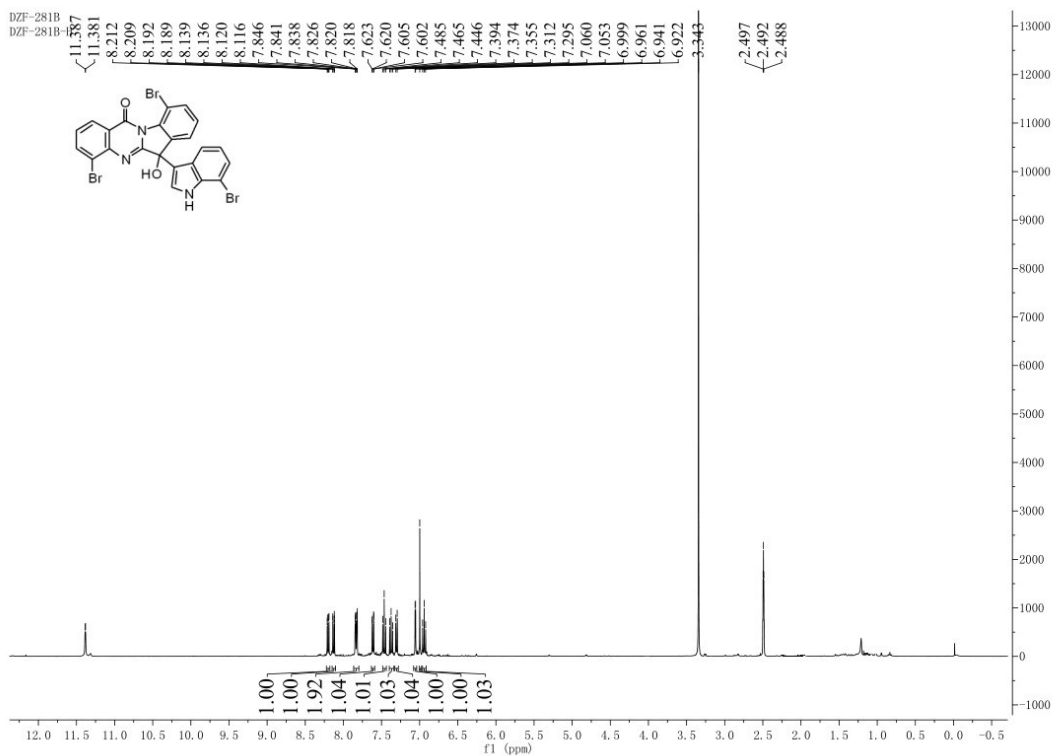

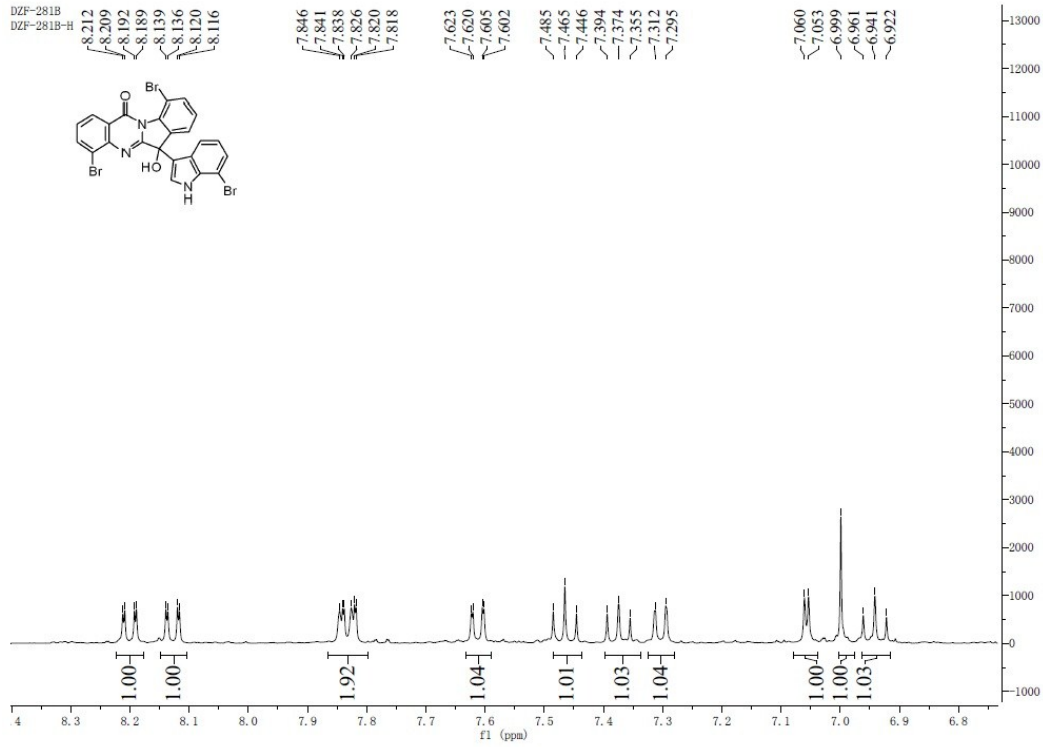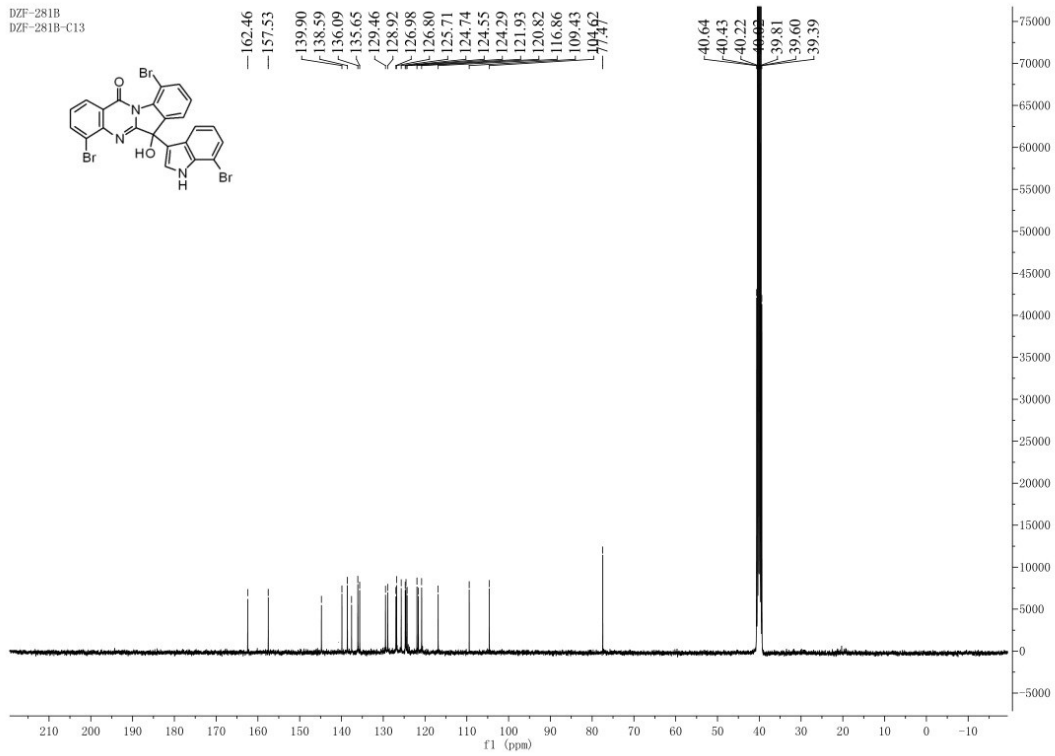

# <sup>1</sup>H and <sup>13</sup>C NMR Spectra for 8a

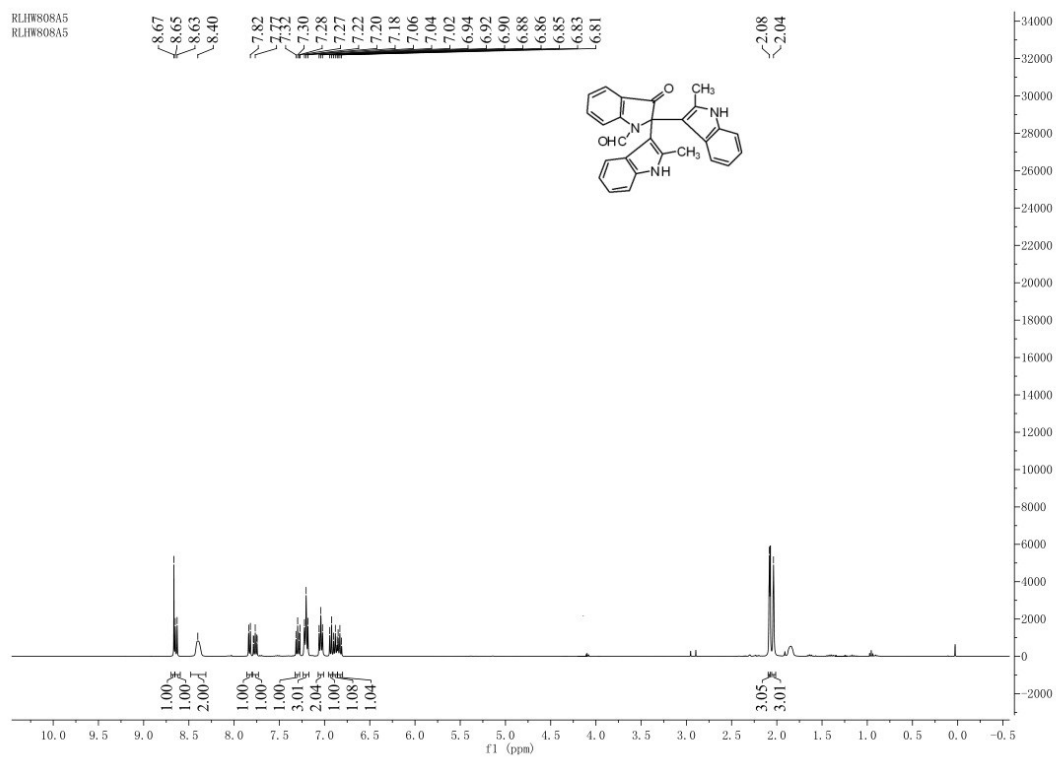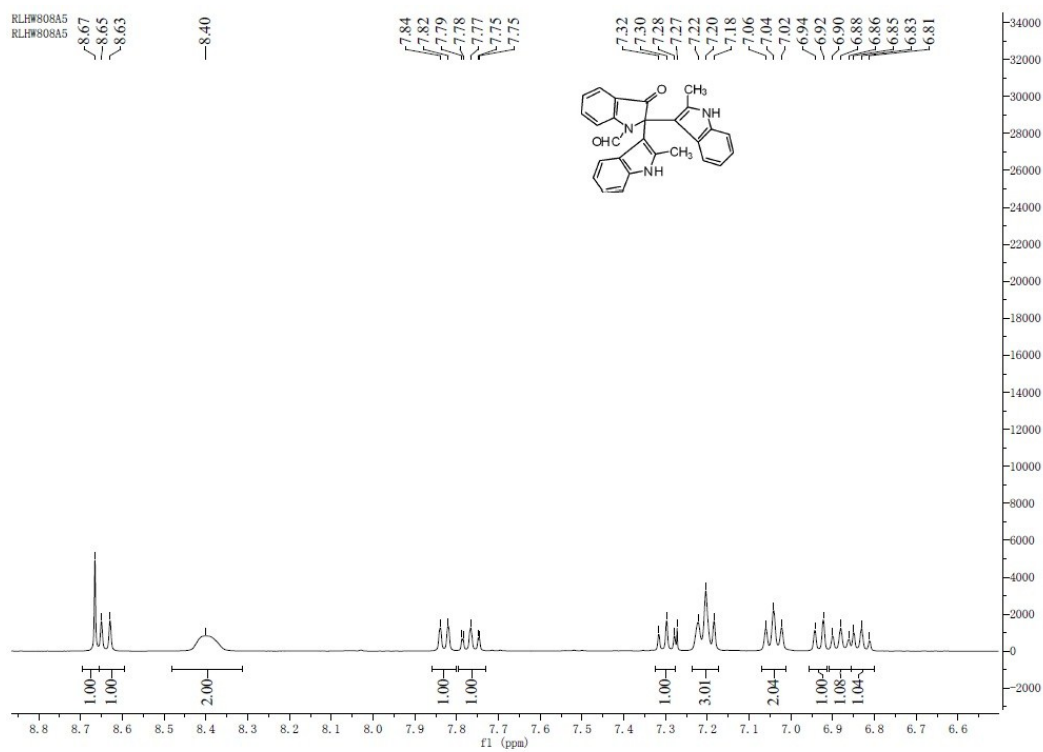

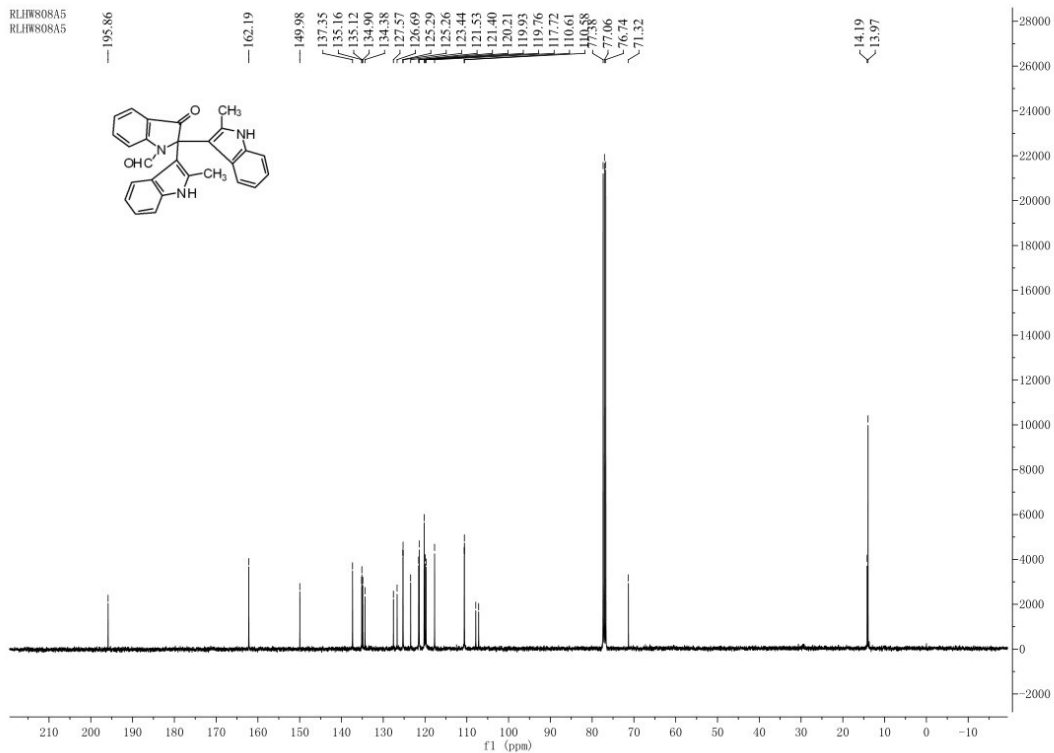

<sup>1</sup>H and <sup>13</sup>C NMR Spectra for **8b**

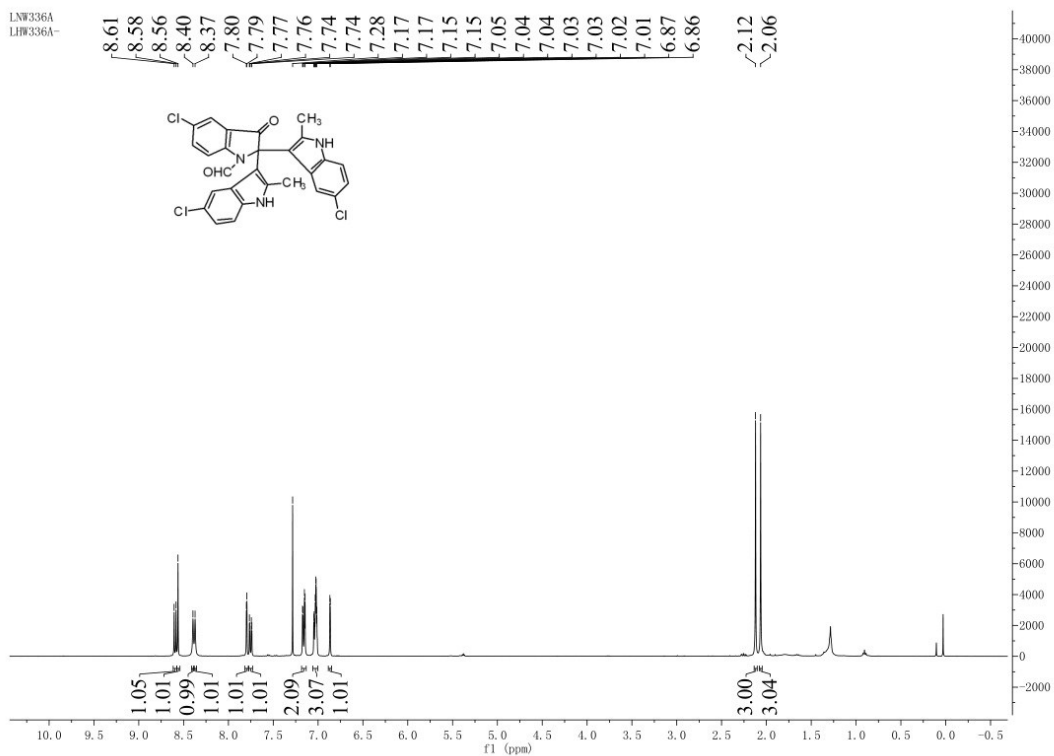

LNW336A  
LHW336A-

8.61  
8.58  
8.56

8.40  
8.37

7.80  
7.79  
7.77  
7.76  
7.74  
7.74

7.28  
7.17  
7.15  
7.15  
7.03  
7.03  
6.87  
6.86

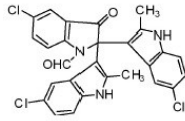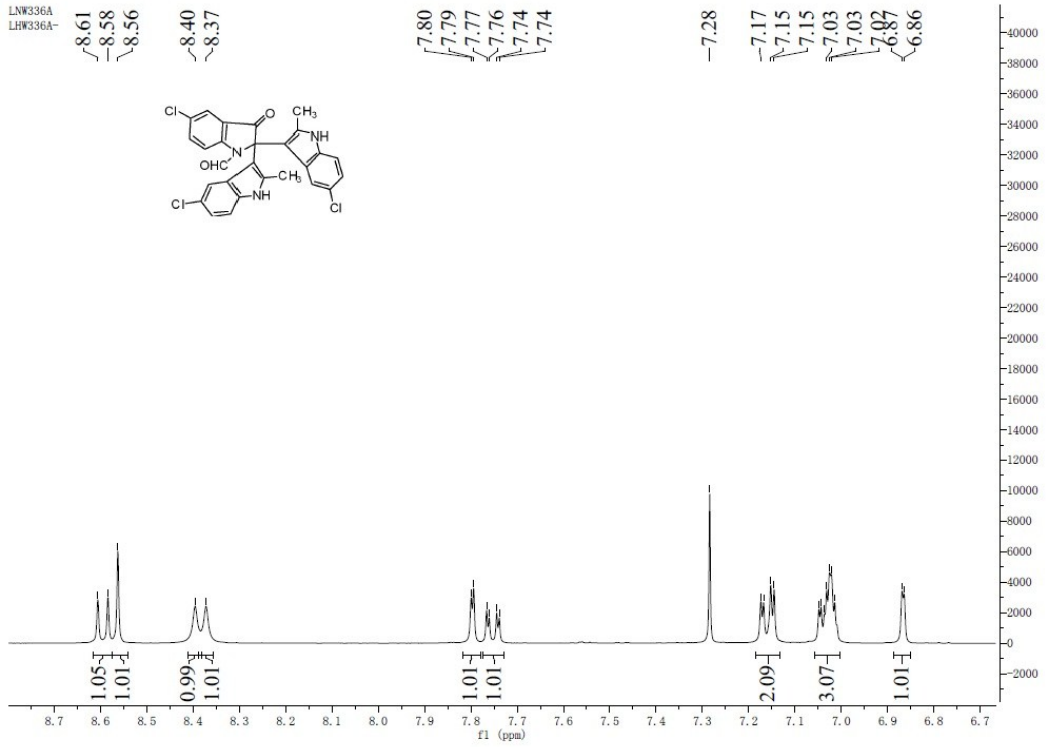

LNW336A  
LHW336A-

193.76

161.49

148.09

137.50  
136.85  
135.73  
133.49  
133.42  
131.20  
126.20  
126.10  
125.03  
124.44  
122.40  
122.18  
119.14  
119.12  
118.91  
111.78  
111.75  
77.05  
76.94  
71.23

14.25  
14.14

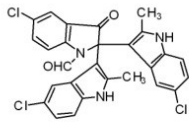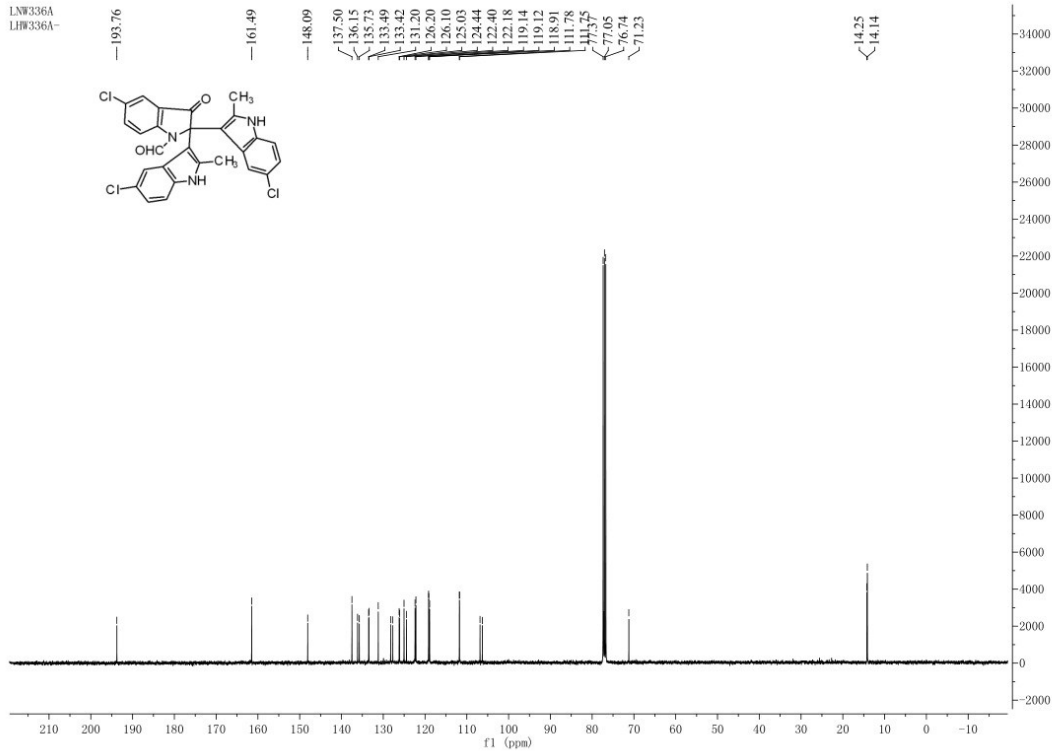

# <sup>1</sup>H and <sup>13</sup>C NMR Spectra for **8c**

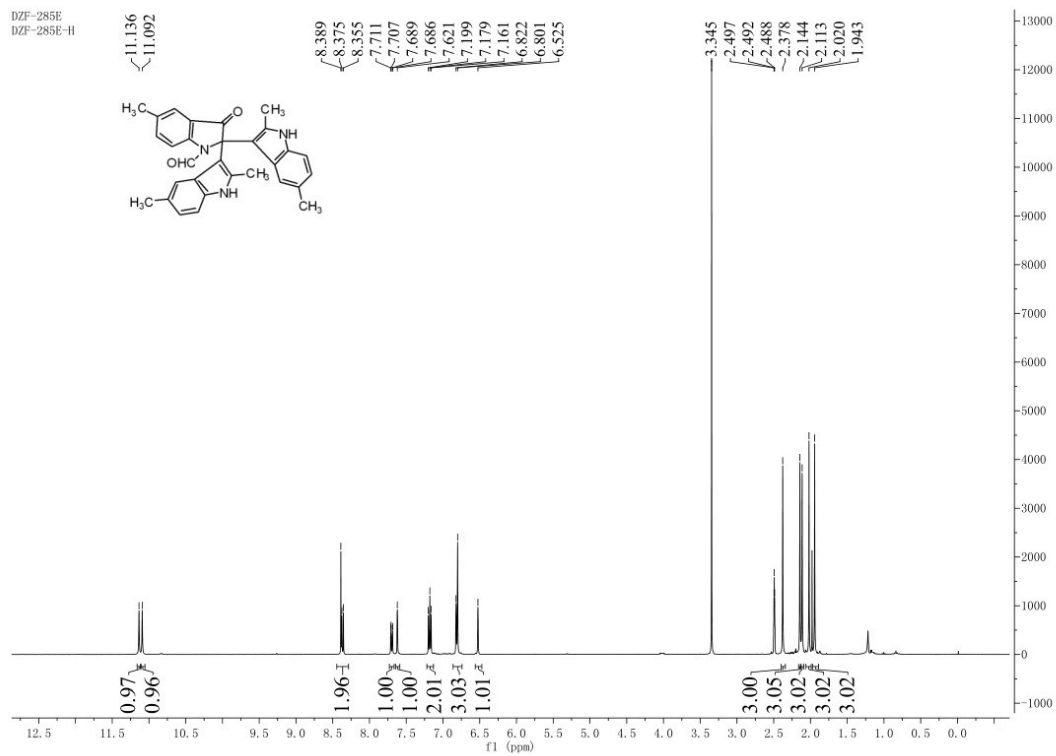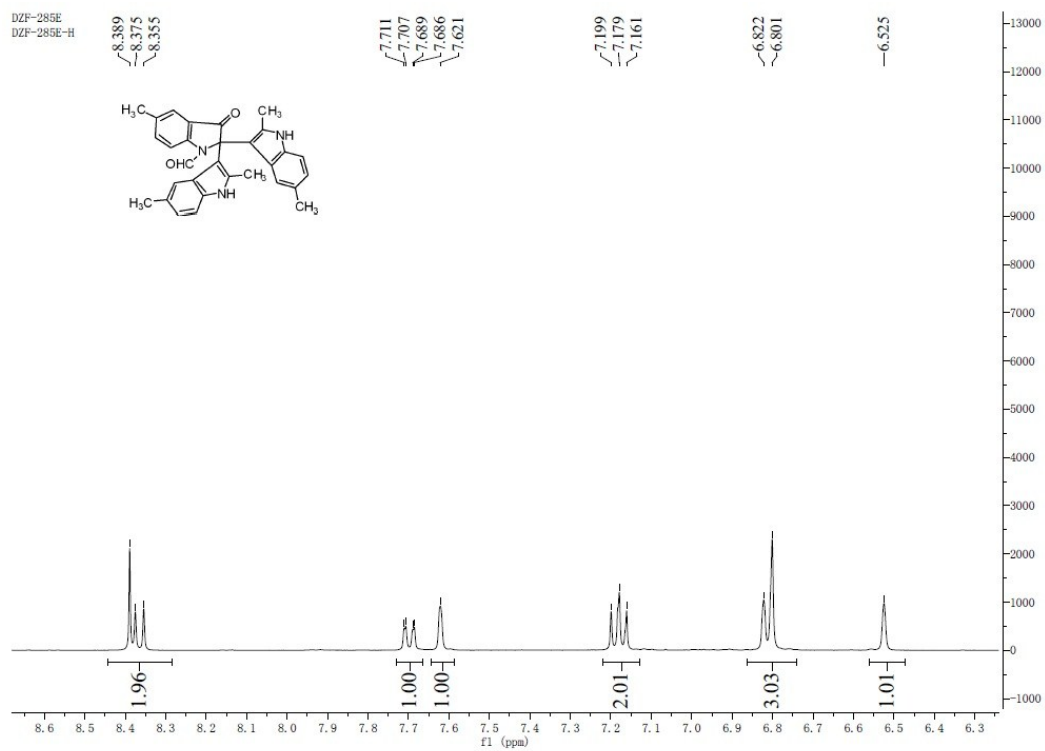

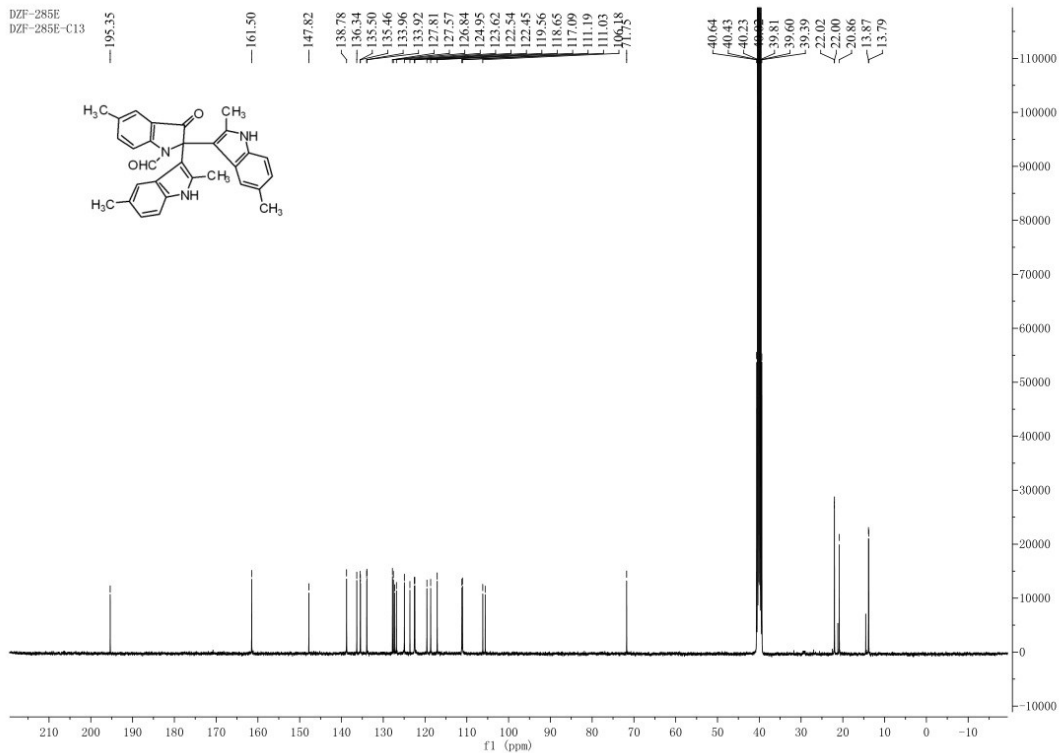

### <sup>1</sup>H and <sup>13</sup>C NMR Spectra for 10

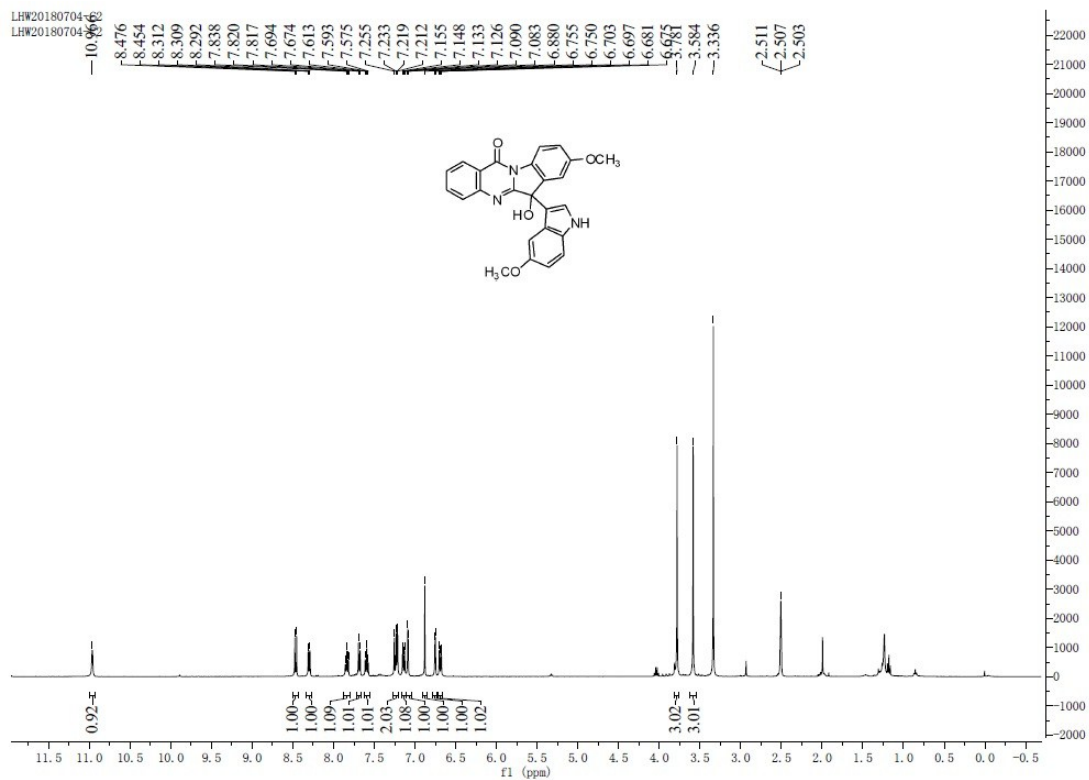

LHW20180704-C2  
LHW20180704-C2

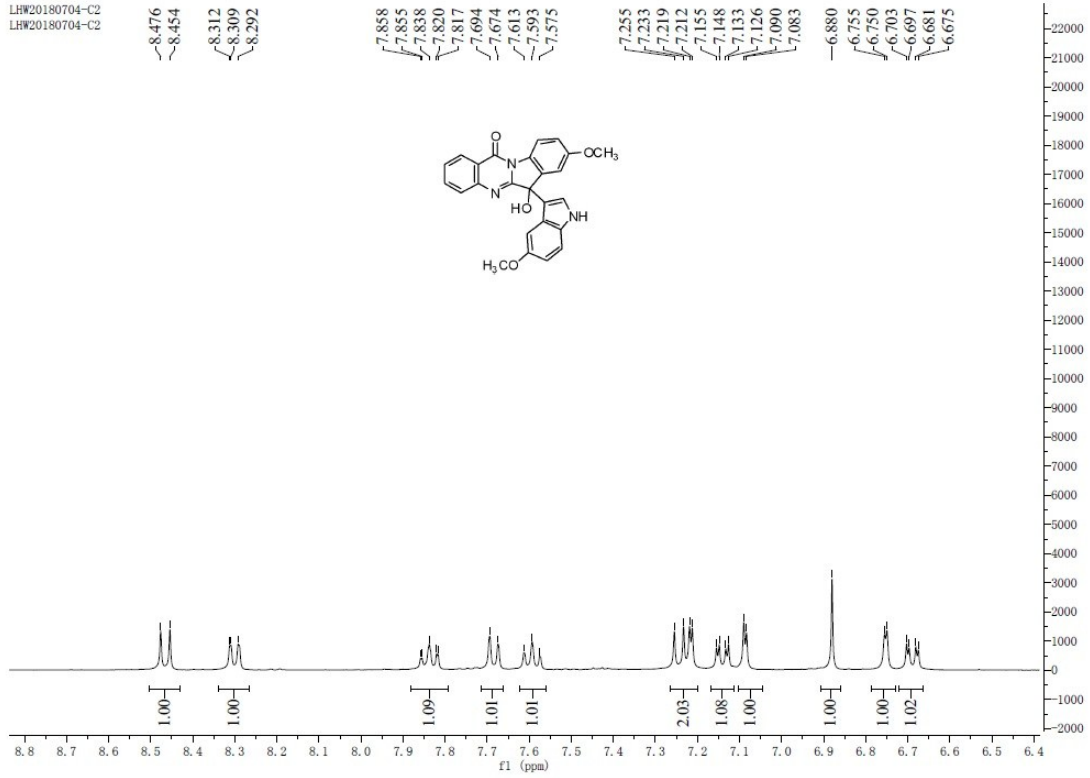

LHW-C2  
LHW-C2

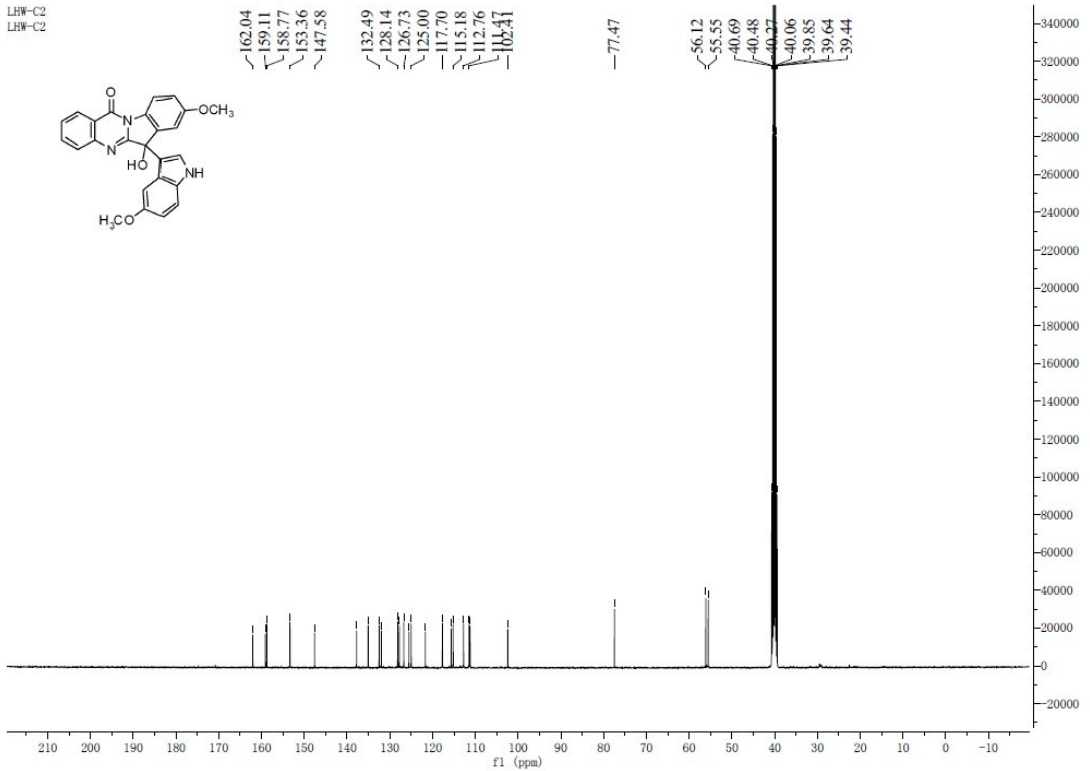



## 6. Copies of HRESIMS Spectra for <sup>18</sup>O-6a

D:\DATA>wanghengshan\20180712wgcg-pxj\B2

07/12/18 11:56:06

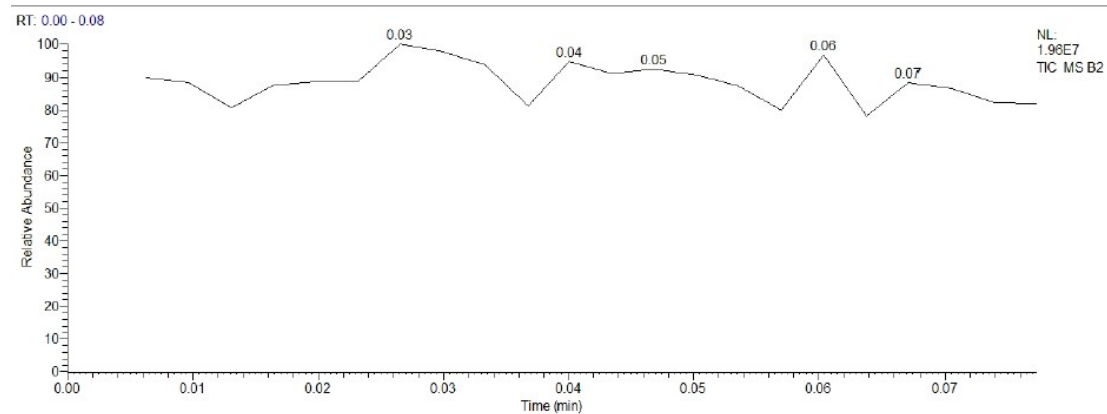

B2 #2 RT: 0.01 AV: 1 NL: 1.51E4  
T: FTMS + p ESI Full ms [200.00-500.00]

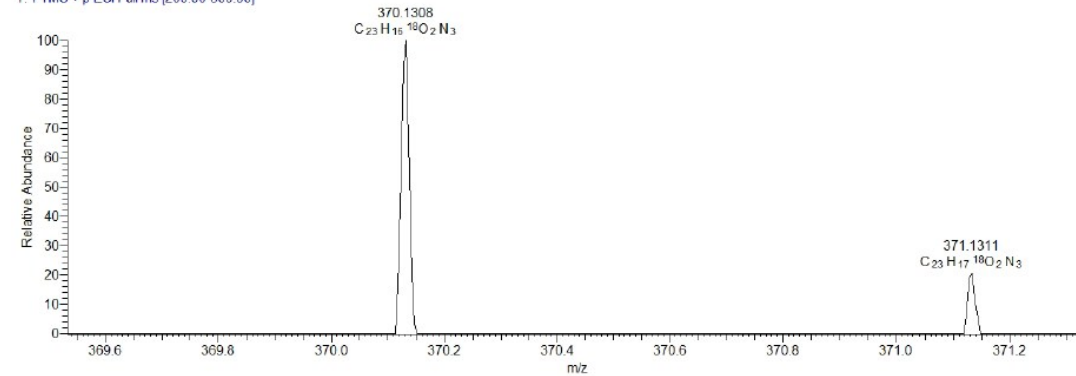

# Copies of HRESIMS Spectra for 8c

## Analysis Info

Analysis Name D:\Data\origin data\zhanghuijun\wujiajun\20170801\POS\_ESI\_20170801\_285E\_000002.d  
 Method APEX\_Pos\_NaFA\_400\_20100407  
 Sample Name  
 Comment

Acquisition Date 8/1/2017 10:47:37

Operator  
Instrument apex-Ultra

## Acquisition Parameter

|                          |            |                         |                    |                       |                          |
|--------------------------|------------|-------------------------|--------------------|-----------------------|--------------------------|
| Polarity                 | Positive   | Source                  | ESI                | No. of Laser Shots    | 20                       |
| Averaged Scans           | 2          | No. of Cell Fills       | 1                  | Laser Power           | 51.0 %                   |
| Broadband Low Mass       | 100.4 m/z  | End Plate               | 3900.0 V           | MALDI Plate           | 300.0 V                  |
| Broadband High Mass      | 3000.0 m/z | Capillary Entrance      | 4400.0 V           | Imaging Spot Diameter | 2000.0 $\mu$ m           |
| Acquisition Mode         | Single MS  | Skimmer 1               | 36.0 V             |                       |                          |
| Pulse Program            | basic      | Drying Gas Temperature  | 200.0 $^{\circ}$ C | Calibration Date      | Fri Jul 28 08:24:01 2017 |
| Source Accumulation      | 0.0 sec    | Drying Gas Flow Rate    | 4.0 L/min          | Data Acquisition Size | 1048576                  |
| Ion Accumulation Time    | 1.0 sec    | Nebulizer Gas Flow Rate | 1.0 L/min          | Apodization           | Sine-Bell Multiplication |
| Flight Time to Acq. Cell | 0.0 sec    |                         |                    |                       |                          |

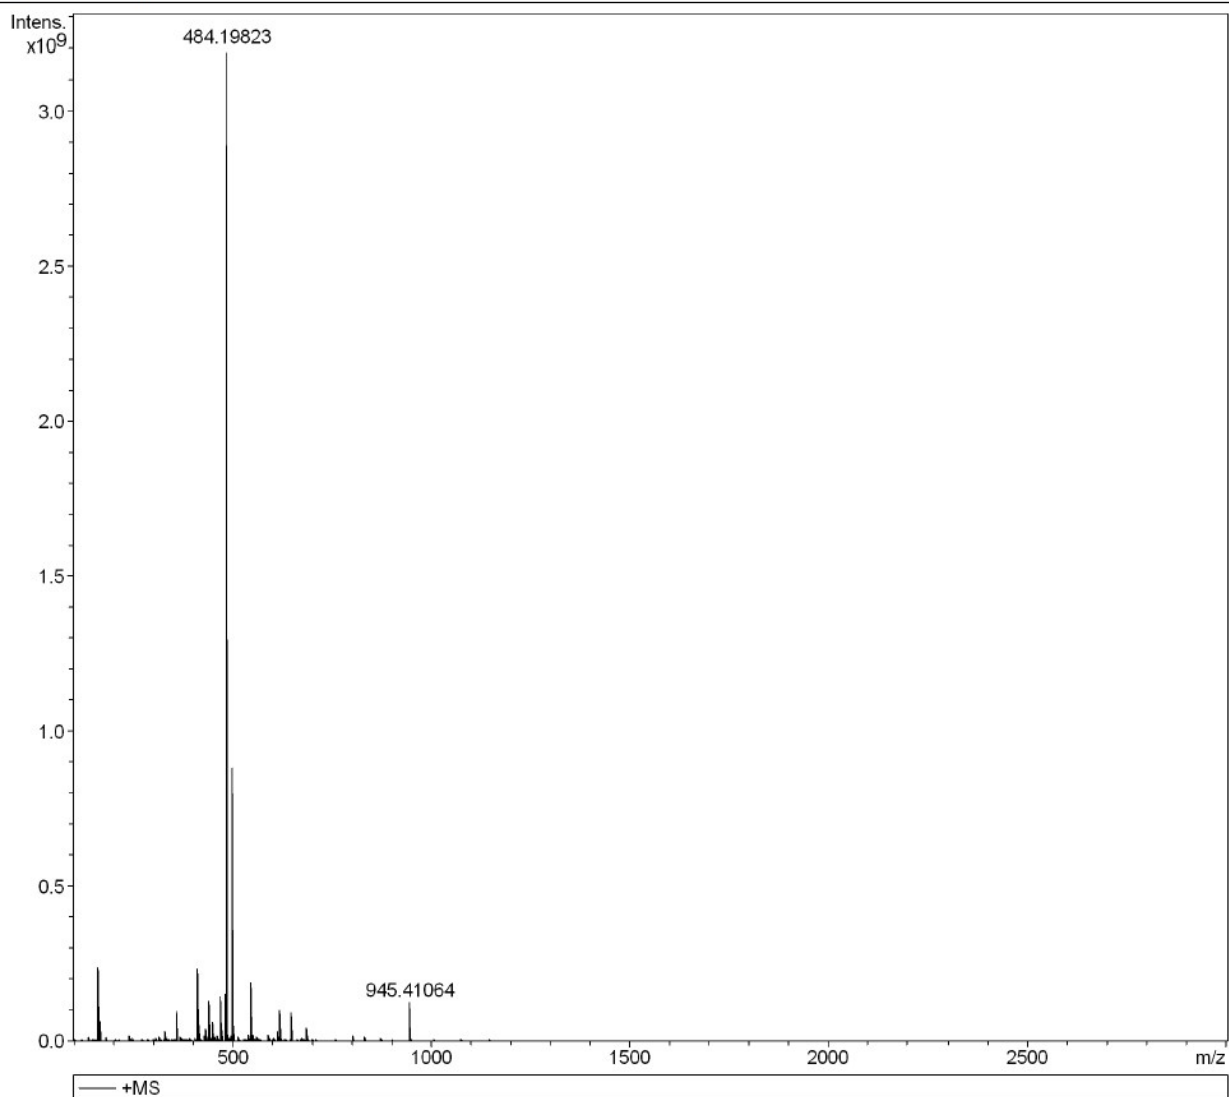

## 7. X-ray Data of Compound 6a.

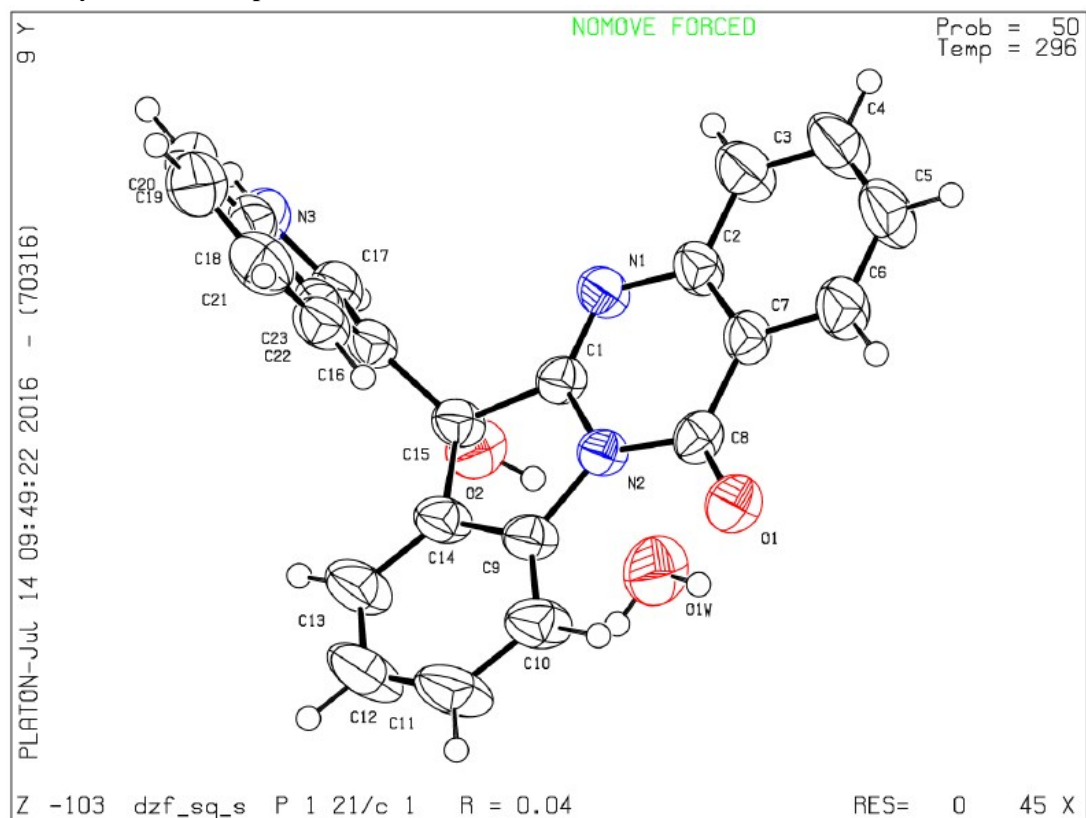

**Figure 1.** ORTEP representation of the molecular structure of **6a**. The data have been assigned the following deposition numbers, **CCDC 1842423**.

## 8. X-ray Data of Compound 8a.

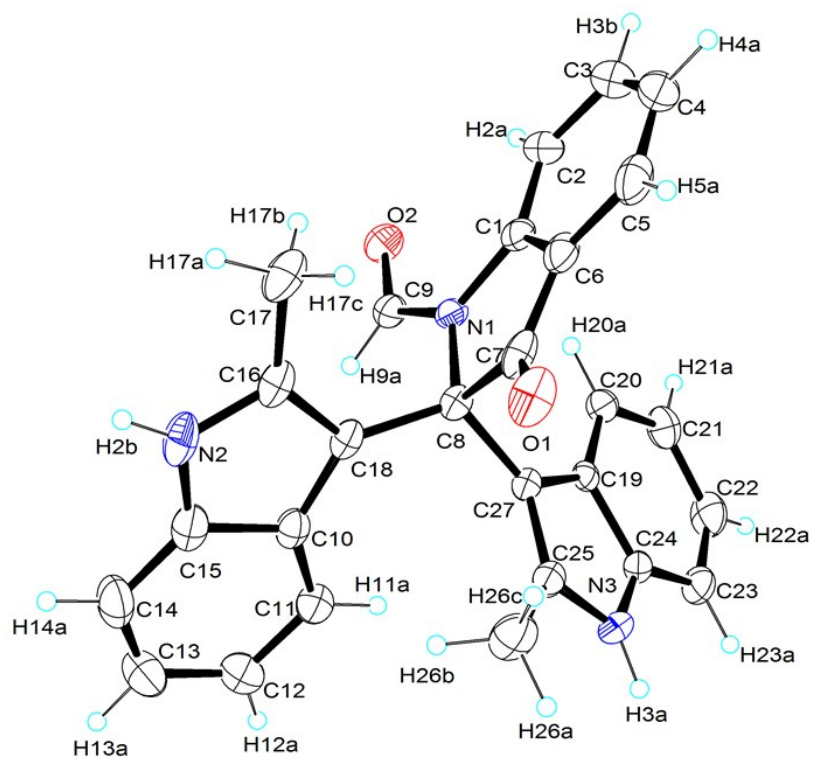

**Figure 2.** ORTEP representation of the molecular structure of **8a**. The data have been assigned the following deposition numbers, **CCDC 1556114**.

## 9. References

- (1) B. V. S. Reddy, D. M. Reddy, G. N. Reddy, M. R. Reddy and V. K. Reddy, *Eur. J. Org. Chem.* **2015**, 8018–8022.
